# Supplementary material for: Colour As a Signal for Entraining the Mammalian Circadian Clock
Source: PLoS Biol. 2015 Apr 17;13(4):e1002127. doi: 10.1371/journal.pbio.1002127 (PMC4401556; doi:10.1371/journal.pbio.1002127)
Supplement: S1 Data — (XLSX) [file pbio.1002127.s001.xlsx]

## Sheet: Fig1A
		Log[total optical power (W/m2)]
		DAWN		DUSK
	Solar Angle	MEAN	SD	MEAN	SD
	6.75	1.31206	0.243283	1.29409	0.253211
	6.25	1.28737	0.247786	1.26558	0.239923
	5.75	1.25708	0.246835	1.22194	0.25328
	5.25	1.21961	0.22656	1.18575	0.239101
	4.75	1.17458	0.232624	1.16147	0.22794
	4.25	1.12218	0.254696	1.12685	0.219917
	3.75	1.07117	0.26331	1.08046	0.215349
	3.25	1.03468	0.240895	1.01083	0.242642
	2.75	0.97415	0.238458	0.951299	0.245695
	2.25	0.895262	0.245518	0.882603	0.234909
	1.75	0.827054	0.237946	0.792146	0.243314
	1.25	0.739688	0.228448	0.700642	0.237151
	0.75	0.631335	0.236501	0.592242	0.23405
	0.25	0.514159	0.236275	0.459758	0.23243
	-0.25	0.377587	0.233379	0.3049	0.244168
	-0.75	0.208957	0.24707	0.145837	0.252181
	-1.25	0.0340279	0.257952	-0.000813352	0.248838
	-1.75	-0.123673	0.252651	-0.152942	0.258894
	-2.25	-0.277749	0.248418	-0.297826	0.263495
	-2.75	-0.422234	0.229514	-0.440489	0.266258
	-3.25	-0.5621	0.206454	-0.593315	0.252702
	-3.75	-0.726887	0.199224	-0.742975	0.239203
	-4.25	-0.892558	0.205389	-0.888078	0.220451
	-4.75	-1.05857	0.179972	-1.03059	0.209703
	-5.25	-1.21045	0.154139	-1.16878	0.194979
	-5.75	-1.31223	0.124738	-1.32058	0.291237
	-6.25	-1.40804	0.158082	-1.39651	0.173107
	-6.75	-1.45381	0.119382	-1.50918	0.270439

## Sheet: Fig1B
		Normalised spectral power distribution				Normalised sensitivity profile
	Wavelength	6 deg. below horizon	6 deg. above horizon		Wavelength	UVS opsin	MWS opsin
	330	0.489206	0.305724		330	0.480896	0.113375
	330.5	0.482006	0.311646		330.5	0.488779	0.115113
	331	0.400249	0.316641		331	0.49663	0.116823
	331.5	0.388562	0.32127		331.5	0.504455	0.118505
	332	0.434786	0.325204		332	0.512257	0.120161
	332.5	0.358757	0.327285		332.5	0.520042	0.121791
	333	0.244017	0.328348		333	0.527813	0.123396
	333.5	0.229583	0.329588		333.5	0.535575	0.124975
	334	0.209283	0.330534		334	0.543333	0.126531
	334.5	0.169683	0.330957		334.5	0.55109	0.128063
	335	0.219365	0.331888		335	0.558851	0.129572
	335.5	0.259885	0.333573		335.5	0.566621	0.131059
	336	0.240447	0.336071		336	0.574404	0.132526
	336.5	0.312356	0.340002		336.5	0.582205	0.133972
	337	0.394235	0.344365		337	0.590028	0.135399
	337.5	0.335239	0.347906		337.5	0.597877	0.136808
	338	0.329748	0.351901		338	0.605756	0.1382
	338.5	0.441465	0.357086		338.5	0.613672	0.139575
	339	0.466246	0.362552		339	0.621627	0.140936
	339.5	0.454378	0.368554		339.5	0.629627	0.142282
	340	0.535186	0.375212		340	0.637677	0.143616
	340.5	0.568972	0.380539		340.5	0.645778	0.144938
	341	0.521505	0.383412		341	0.653931	0.146247
	341.5	0.567984	0.384649		341.5	0.662131	0.147544
	342	0.632381	0.384465		342	0.670376	0.148828
	342.5	0.560423	0.383104		342.5	0.678661	0.150098
	343	0.537558	0.382281		343	0.686984	0.151354
	343.5	0.640513	0.382412		343.5	0.69534	0.152595
	344	0.652974	0.382026		344	0.703725	0.153821
	344.5	0.597384	0.381149		344.5	0.712136	0.155032
	345	0.628705	0.380788		345	0.720568	0.156227
	345.5	0.642067	0.380468		345.5	0.729016	0.157405
	346	0.584529	0.380272		346	0.737475	0.158567
	346.5	0.573891	0.381692		346.5	0.745941	0.159711
	347	0.545383	0.384657		347	0.754409	0.160838
	347.5	0.430862	0.388234		347.5	0.762873	0.161946
	348	0.4133	0.392536		348	0.771327	0.163037
	348.5	0.486232	0.396986		348.5	0.779767	0.164108
	349	0.424423	0.400125		349	0.788186	0.165161
	349.5	0.34189	0.402839		349.5	0.796579	0.166193
	350	0.430533	0.406783		350	0.804939	0.167206
	350.5	0.492228	0.411178		350.5	0.813259	0.168199
	351	0.429307	0.415765		351	0.821531	0.169171
	351.5	0.429784	0.421584		351.5	0.829744	0.17012
	352	0.475456	0.427612		352	0.837888	0.171047
	352.5	0.449934	0.432038		352.5	0.845952	0.171949
	353	0.458528	0.434712		353	0.853926	0.172826
	353.5	0.511442	0.43541		353.5	0.861798	0.173677
	354	0.462891	0.433657		354	0.869559	0.174502
	354.5	0.416144	0.430382		354.5	0.877195	0.175298
	355	0.472969	0.426148		355	0.884697	0.176066
	355.5	0.464281	0.420597		355.5	0.892053	0.176805
	356	0.400514	0.41484		356	0.89925	0.177513
	356.5	0.418094	0.410265		356.5	0.906277	0.17819
	357	0.431343	0.40635		357	0.913122	0.178836
	357.5	0.407817	0.402562		357.5	0.919773	0.179448
	358	0.491294	0.399764		358	0.926218	0.180028
	358.5	0.634916	0.398306		358.5	0.932444	0.180573
	359	0.648565	0.398209		359	0.938439	0.181084
	359.5	0.618234	0.400289		359.5	0.944192	0.181559
	360	0.669656	0.405214		360	0.949689	0.181998
	360.5	0.686471	0.412367		360.5	0.954921	0.182402
	361	0.647656	0.420616		361	0.959881	0.182769
	361.5	0.666553	0.42913		361.5	0.964566	0.183103
	362	0.717725	0.437226		362	0.968975	0.183403
	362.5	0.72191	0.444983		362.5	0.973103	0.183672
	363	0.73308	0.453643		363	0.976947	0.18391
	363.5	0.734547	0.463598		363.5	0.980504	0.184119
	364	0.615477	0.473705		364	0.983773	0.1843
	364.5	0.525086	0.483445		364.5	0.986749	0.184453
	365	0.593034	0.492728		365	0.989431	0.184582
	365.5	0.624658	0.500784		365.5	0.991815	0.184686
	366	0.559893	0.507676		366	0.9939	0.184767
	366.5	0.548723	0.514343		366.5	0.995683	0.184826
	367	0.560553	0.520571		367	0.997163	0.184865
	367.5	0.524543	0.525461		367.5	0.998336	0.184885
	368	0.506269	0.528524		368	0.999201	0.184887
	368.5	0.479192	0.529106		368.5	0.999756	0.184872
	369	0.408316	0.527126		369	1	0.184843
	369.5	0.414553	0.523569		369.5	0.999931	0.1848
	370	0.4902	0.518689		370	0.999546	0.184744
	370.5	0.492184	0.512339		370.5	0.998845	0.184678
	371	0.480424	0.505134		371	0.997819	0.1846
	371.5	0.533491	0.497598		371.5	0.99646	0.184511
	372	0.541551	0.489811		372	0.99476	0.184411
	372.5	0.489302	0.482688		372.5	0.992712	0.1843
	373	0.489475	0.47744		373	0.990307	0.184179
	373.5	0.53843	0.474648		373.5	0.98754	0.184047
	374	0.554979	0.474575		374	0.984402	0.183904
	374.5	0.550609	0.477553		374.5	0.980889	0.18375
	375	0.558856	0.483743		375	0.976994	0.183587
	375.5	0.551488	0.492212		375.5	0.972711	0.183413
	376	0.53107	0.501505		376	0.968037	0.183229
	376.5	0.526462	0.510585		376.5	0.962966	0.183036
	377	0.53327	0.519018		377	0.957494	0.182833
	377.5	0.55092	0.526379		377.5	0.951619	0.182621
	378	0.593216	0.531749		378	0.945338	0.1824
	378.5	0.620879	0.533913		378.5	0.938648	0.182171
	379	0.593454	0.531361		379	0.931548	0.181933
	379.5	0.582093	0.523454		379.5	0.924038	0.181687
	380	0.615236	0.510516		380	0.916118	0.181434
	380.5	0.612676	0.494075		380.5	0.907789	0.181174
	381	0.584029	0.477241		381	0.899055	0.180907
	381.5	0.603789	0.463097		381.5	0.889922	0.180635
	382	0.637838	0.452531		382	0.880396	0.18036
	382.5	0.636805	0.444716		382.5	0.870483	0.180081
	383	0.639828	0.438719		383	0.860192	0.1798
	383.5	0.642707	0.434048		383.5	0.849531	0.179519
	384	0.611382	0.430954		384	0.838507	0.179238
	384.5	0.603	0.430724		384.5	0.827131	0.178958
	385	0.625571	0.434179		385	0.815414	0.17868
	385.5	0.607545	0.441135		385.5	0.803365	0.178406
	386	0.593085	0.45089		386	0.790997	0.178137
	386.5	0.640961	0.462459		386.5	0.778322	0.177873
	387	0.648309	0.474237		387	0.765353	0.177616
	387.5	0.589226	0.485595		387.5	0.752104	0.177367
	388	0.582775	0.496798		388	0.73859	0.177127
	388.5	0.610136	0.507159		388.5	0.724826	0.176897
	389	0.598758	0.515146		389	0.710827	0.176678
	389.5	0.599848	0.519227		389.5	0.69661	0.176471
	390	0.621097	0.518527		390	0.682193	0.176278
	390.5	0.603314	0.513916		390.5	0.667592	0.176099
	391	0.584218	0.507772		391	0.652826	0.175935
	391.5	0.597231	0.502584		391.5	0.637911	0.175787
	392	0.575096	0.498907		392	0.622865	0.175655
	392.5	0.549709	0.495862		392.5	0.607707	0.175541
	393	0.603528	0.491267		393	0.592456	0.175443
	393.5	0.654745	0.483757		393.5	0.577132	0.175364
	394	0.638193	0.474654		394	0.561755	0.175304
	394.5	0.624756	0.468435		394.5	0.546346	0.175264
	395	0.623901	0.470224		395	0.530925	0.175244
	395.5	0.592088	0.482897		395.5	0.515513	0.175245
	396	0.579617	0.505299		396	0.500132	0.175267
	396.5	0.623237	0.533231		396.5	0.484802	0.175312
	397	0.647619	0.561988		397	0.469545	0.175379
	397.5	0.641906	0.589138		397.5	0.454381	0.17547
	398	0.668257	0.615175		398	0.439331	0.175585
	398.5	0.687232	0.642362		398.5	0.424416	0.175725
	399	0.661152	0.672005		399	0.409654	0.17589
	399.5	0.650356	0.70343		399.5	0.395065	0.176082
	400	0.657251	0.733664		400	0.380668	0.1763
	400.5	0.640053	0.759224		400.5	0.366479	0.176545
	401	0.65121	0.778162		401	0.352518	0.176819
	401.5	0.710969	0.790611		401.5	0.338799	0.177122
	402	0.713198	0.797755		402	0.325339	0.177454
	402.5	0.667903	0.801107		402.5	0.312152	0.177818
	403	0.676304	0.802214		403	0.29925	0.178214
	403.5	0.682911	0.801428		403.5	0.286646	0.178642
	404	0.639143	0.798992		404	0.274349	0.179104
	404.5	0.621683	0.796085		404.5	0.26237	0.179601
	405	0.627275	0.793798		405	0.250715	0.180133
	405.5	0.599404	0.792554		405.5	0.239392	0.180702
	406	0.598092	0.79238		406	0.228406	0.181307
	406.5	0.639059	0.792705		406.5	0.217761	0.18195
	407	0.618023	0.7927		407	0.20746	0.182632
	407.5	0.5805	0.792886		407.5	0.197503	0.183354
	408	0.617978	0.794586		408	0.187893	0.184116
	408.5	0.632032	0.798058		408.5	0.178628	0.184919
	409	0.591285	0.803266		409	0.169706	0.185764
	409.5	0.613436	0.809769		409.5	0.161125	0.186651
	410	0.681868	0.81619		410	0.152882	0.187582
	410.5	0.714718	0.821376		410.5	0.144971	0.188557
	411	0.760659	0.825417		411	0.137388	0.189576
	411.5	0.813987	0.828917		411.5	0.130126	0.190641
	412	0.794144	0.832432		412	0.12318	0.191752
	412.5	0.777074	0.836858		412.5	0.116542	0.19291
	413	0.841281	0.842316		413	0.110204	0.194114
	413.5	0.886578	0.847153		413.5	0.104159	0.195366
	414	0.893001	0.850027		414	0.0983982	0.196667
	414.5	0.949805	0.850812		414.5	0.0929131	0.198017
	415	1	0.849958		415	0.0876949	0.199415
	415.5	0.977499	0.848078		415.5	0.0827346	0.200864
	416	0.953058	0.845959		416	0.0780232	0.202363
	416.5	0.939243	0.843941		416.5	0.0735516	0.203913
	417	0.896772	0.842072		417	0.0693106	0.205514
	417.5	0.870589	0.84068		417.5	0.0652912	0.207167
	418	0.878413	0.839794		418	0.0614843	0.208872
	418.5	0.85976	0.83879		418.5	0.057881	0.21063
	419	0.835129	0.837432		419	0.0544725	0.212441
	419.5	0.839079	0.835697		419.5	0.0512501	0.214305
	420	0.809884	0.833603		420	0.0482054	0.216223
	420.5	0.739724	0.831641		420.5	0.0453301	0.218195
	421	0.716636	0.830488		421	0.0426161	0.220222
	421.5	0.746282	0.830141		421.5	0.0400558	0.222304
	422	0.762958	0.829853		422	0.0376415	0.224441
	422.5	0.795375	0.82927		422.5	0.0353659	0.226635
	423	0.877631	0.828168		423	0.033222	0.228885
	423.5	0.928772	0.825781		423.5	0.0312028	0.231192
	424	0.912892	0.822066		424	0.029302	0.233556
	424.5	0.883457	0.817945		424.5	0.0275132	0.235979
	425	0.857349	0.813959		425	0.0258303	0.238459
	425.5	0.833146	0.809729		425.5	0.0242476	0.240998
	426	0.830479	0.804369		426	0.0227595	0.243596
	426.5	0.819578	0.796628		426.5	0.0213608	0.246254
	427	0.77245	0.785684		427	0.0200464	0.248971
	427.5	0.746939	0.772988		427.5	0.0188117	0.251749
	428	0.743496	0.760778		428	0.0176519	0.254587
	428.5	0.697472	0.750866		428.5	0.0165628	0.257486
	429	0.646403	0.744967		429	0.0155402	0.260446
	429.5	0.636147	0.743513		429.5	0.0145804	0.263468
	430	0.629175	0.744724		430	0.0136795	0.266552
	430.5	0.624484	0.747009		430.5	0.0128341	0.269698
	431	0.665071	0.750786		431	0.0120408	0.272906
	431.5	0.71911	0.756702		431.5	0.0112965	0.276176
	432	0.729198	0.765443		432	0.0105983	0.279507
	432.5	0.7422	0.77845		432.5	0.00994326	0.282899
	433	0.781923	0.795263		433	0.00932884	0.286352
	433.5	0.7808	0.812823		433.5	0.00875252	0.289865
	434	0.748518	0.828151		434	0.00821197	0.293437
	434.5	0.743642	0.839334		434.5	0.00770499	0.297069
	435	0.740928	0.845571		435	0.00722951	0.300759
	435.5	0.717208	0.848291		435.5	0.00678359	0.304506
	436	0.704046	0.850265		436	0.00636538	0.308312
	436.5	0.678784	0.852442		436.5	0.00597319	0.312173
	437	0.628104	0.855006		437	0.00560538	0.316091
	437.5	0.629485	0.858371		437.5	0.00526045	0.320064
	438	0.663219	0.861942		438	0.00493697	0.324091
	438.5	0.630237	0.864909		438.5	0.0046336	0.328172
	439	0.591573	0.868093		439	0.00434909	0.332305
	439.5	0.619126	0.87252		439.5	0.00408226	0.33649
	440	0.622752	0.878202		440	0.003832	0.340726
	440.5	0.587749	0.885332		440.5	0.00359729	0.345012
	441	0.60085	0.894218		441	0.00337715	0.349347
	441.5	0.627013	0.903556		441.5	0.00317068	0.35373
	442	0.616125	0.911891		442	0.00297703	0.358163
	442.5	0.613881	0.918815		442.5	0.0027954	0.362644
	443	0.609673	0.924183		443	0.00262504	0.367173
	443.5	0.570762	0.928196		443.5	0.00246524	0.37175
	444	0.566922	0.931734		444	0.00231536	0.376374
	444.5	0.607524	0.935359		444.5	0.00217476	0.381045
	445	0.615632	0.938852		445	0.00204287	0.385762
	445.5	0.622594	0.942523		445.5	0.00191914	0.390526
	446	0.666489	0.946771		446	0.00180307	0.395335
	446.5	0.680274	0.951603		446.5	0.00169417	0.400189
	447	0.654657	0.957535		447	0.001592	0.405089
	447.5	0.64309	0.965057		447.5	0.00149613	0.410033
	448	0.63689	0.973768		448	0.00140617	0.415021
	448.5	0.622569	0.982637		448.5	0.00132175	0.420052
	449	0.632067	0.99032		449	0.00124253	0.425127
	449.5	0.657134	0.995539		449.5	0.00116817	0.430245
	450	0.648026	0.997988		450	0.00109838	0.435405
	450.5	0.614644	0.998512		450.5	0.00103287	0.440607
	451	0.596515	0.998207		451	0.000971372	0.44585
	451.5	0.584357	0.99768		451.5	0.000913634	0.451133
	452	0.571806	0.996918		452	0.000859422	0.456455
	452.5	0.583943	0.995631		452.5	0.000808515	0.461815
	453	0.607585	0.993871		453	0.000760706	0.467213
	453.5	0.609558	0.992037		453.5	0.000715804	0.472647
	454	0.611211	0.990682		454	0.000673626	0.478116
	454.5	0.617676	0.990301		454.5	0.000634005	0.48362
	455	0.581107	0.990881		455	0.00059678	0.489156
	455.5	0.53113	0.992033		455.5	0.000561803	0.494725
	456	0.52123	0.993452		456	0.000528935	0.500325
	456.5	0.513472	0.994736		456.5	0.000498047	0.505954
	457	0.493545	0.99571		457	0.000469014	0.511612
	457.5	0.495221	0.996524		457.5	0.000441724	0.517298
	458	0.497063	0.997323		458	0.000416068	0.52301
	458.5	0.480869	0.998059		458.5	0.000391946	0.528748
	459	0.481014	0.998645		459	0.000369265	0.534509
	459.5	0.483235	0.999014		459.5	0.000347935	0.540294
	460	0.462952	0.999178		460	0.000327874	0.546099
	460.5	0.473095	0.999425		460.5	0.000309004	0.551925
	461	0.520297	0.999775		461	0.000291253	0.55777
	461.5	0.540006	0.999986		461.5	0.000274553	0.563634
	462	0.541452	1		462	0.00025884	0.569514
	462.5	0.564703	0.999791		462.5	0.000244054	0.575409
	463	0.580555	0.99894		463	0.000230138	0.581319
	463.5	0.574098	0.997082		463.5	0.00021704	0.587243
	464	0.576995	0.994301		464	0.000204712	0.593178
	464.5	0.579168	0.99083		464.5	0.000193105	0.599125
	465	0.553813	0.987049		465	0.000182177	0.605081
	465.5	0.528905	0.983593		465.5	0.000171887	0.611046
	466	0.52056	0.98082		466	0.000162197	0.617017
	466.5	0.496675	0.978388		466.5	0.00015307	0.622995
	467	0.470192	0.975993		467	0.000144474	0.628978
	467.5	0.472929	0.973685		467.5	0.000136376	0.634964
	468	0.468873	0.971561		468	0.000128746	0.640952
	468.5	0.446759	0.970078		468.5	0.000121557	0.646941
	469	0.456642	0.969817		469	0.000114782	0.65293
	469.5	0.480446	0.970478		469.5	0.000108398	0.658917
	470	0.470433	0.971195		470	0.00010238	0.664901
	470.5	0.47116	0.971747		470.5	9.67071e-05	0.670881
	471	0.501843	0.972096		471	9.13589e-05	0.676855
	471.5	0.51485	0.972158		471.5	8.63161e-05	0.68282
	472	0.526208	0.972372		472	8.15606e-05	0.688775
	472.5	0.555338	0.9729		472.5	7.70756e-05	0.694718
	473	0.550557	0.97316		473	7.28451e-05	0.700647
	473.5	0.523472	0.972864		473.5	6.88542e-05	0.706559
	474	0.542699	0.9724		474	6.50889e-05	0.712453
	474.5	0.556254	0.971596		474.5	6.1536e-05	0.718326
	475	0.514111	0.970416		475	5.81831e-05	0.724177
	475.5	0.49552	0.969703		475.5	5.50185e-05	0.730002
	476	0.505117	0.969583		476	5.20314e-05	0.7358
	476.5	0.481364	0.969581		476.5	4.92115e-05	0.741569
	477	0.458815	0.969787		477	4.6549e-05	0.747306
	477.5	0.467187	0.970489		477.5	4.40349e-05	0.753009
	478	0.463403	0.971705		478	4.16607e-05	0.758676
	478.5	0.457074	0.973639		478.5	3.94184e-05	0.764304
	479	0.475064	0.976203		479	3.73003e-05	0.769891
	479.5	0.459422	0.97847		479.5	3.52993e-05	0.775434
	480	0.412946	0.979973		480	3.34089e-05	0.780932
	480.5	0.413348	0.980769		480.5	3.16226e-05	0.786381
	481	0.436892	0.980512		481	2.99347e-05	0.791783
	481.5	0.434917	0.978814		481.5	2.83396e-05	0.797137
	482	0.440606	0.975241		482	2.68322e-05	0.802444
	482.5	0.457221	0.969093		482.5	2.54075e-05	0.807703
	483	0.442187	0.960151		483	2.4061e-05	0.812916
	483.5	0.420964	0.949328		483.5	2.27883e-05	0.818082
	484	0.429187	0.938171		484	2.15853e-05	0.823203
	484.5	0.424284	0.927857		484.5	2.0448e-05	0.828278
	485	0.398208	0.91912		485	1.93728e-05	0.833309
	485.5	0.407938	0.912138		485.5	1.83563e-05	0.838296
	486	0.438098	0.906864		486	1.73952e-05	0.843239
	486.5	0.442615	0.903283		486.5	1.64864e-05	0.84814
	487	0.442722	0.901657		487	1.56269e-05	0.852999
	487.5	0.445191	0.902434		487.5	1.48141e-05	0.857817
	488	0.428241	0.905565		488	1.40454e-05	0.862594
	488.5	0.421564	0.910603		488.5	1.33183e-05	0.867332
	489	0.443207	0.916668		489	1.26304e-05	0.872031
	489.5	0.435589	0.922471		489.5	1.19797e-05	0.876692
	490	0.402303	0.927245		490	1.13641e-05	0.881316
	490.5	0.404336	0.930992		490.5	1.07816e-05	0.885904
	491	0.398727	0.93389		491	1.02303e-05	0.890452
	491.5	0.35109	0.935987		491.5	9.70844e-06	0.894956
	492	0.328449	0.937532		492	9.21442e-06	0.899414
	492.5	0.342988	0.938485		492.5	8.74665e-06	0.903821
	493	0.348769	0.938754		493	8.30364e-06	0.908174
	493.5	0.352675	0.938974		493.5	7.88403e-06	0.912468
	494	0.35897	0.939626		494	7.48649e-06	0.916699
	494.5	0.345149	0.940473		494.5	7.10982e-06	0.920864
	495	0.352858	0.941195		495	6.75285e-06	0.924959
	495.5	0.416368	0.941475		495.5	6.41451e-06	0.928979
	496	0.463043	0.940675		496	6.09376e-06	0.932921
	496.5	0.467665	0.938603		496.5	5.78965e-06	0.93678
	497	0.493819	0.935558		497	5.50127e-06	0.940551
	497.5	0.529839	0.931384		497.5	5.22776e-06	0.944232
	498	0.537644	0.925853		498	4.96832e-06	0.947816
	498.5	0.541082	0.91946		498.5	4.72219e-06	0.951301
	499	0.545025	0.912672		499	4.48865e-06	0.954682
	499.5	0.530284	0.905734		499.5	4.26704e-06	0.957954
	500	0.512247	0.899069		500	4.0567e-06	0.961112
	500.5	0.503327	0.892865		500.5	3.85704e-06	0.964154
	501	0.469968	0.886981		501	3.66751e-06	0.967078
	501.5	0.426331	0.881632		501.5	3.48758e-06	0.969883
	502	0.422622	0.877461		502	3.31676e-06	0.972567
	502.5	0.421905	0.874637		502.5	3.15457e-06	0.975131
	503	0.385406	0.873115		503	3.00056e-06	0.977572
	503.5	0.35967	0.872943		503.5	2.85432e-06	0.979892
	504	0.3646	0.873588		504	2.71544e-06	0.982088
	504.5	0.361301	0.874216		504.5	2.58354e-06	0.984161
	505	0.357679	0.874731		505	2.45827e-06	0.986109
	505.5	0.373406	0.875529		505.5	2.33928e-06	0.987932
	506	0.374199	0.876672		506	2.22625e-06	0.989629
	506.5	0.363783	0.878162		506.5	2.11888e-06	0.9912
	507	0.372158	0.879884		507	2.01687e-06	0.992644
	507.5	0.360853	0.881214		507.5	1.91995e-06	0.993961
	508	0.31844	0.881849		508	1.82785e-06	0.995149
	508.5	0.315901	0.882129		508.5	1.74034e-06	0.99621
	509	0.341474	0.882238		509	1.65718e-06	0.997141
	509.5	0.332375	0.882115		509.5	1.57814e-06	0.997944
	510	0.330262	0.8819		510	1.50301e-06	0.998616
	510.5	0.353632	0.881313		510.5	1.4316e-06	0.999159
	511	0.344431	0.879862		511	1.36372e-06	0.99957
	511.5	0.320161	0.877724		511.5	1.29918e-06	0.999849
	512	0.330344	0.87523		512	1.23781e-06	0.999992
	512.5	0.336609	0.871974		512.5	1.17946e-06	1
	513	0.32857	0.867395		513	1.12396e-06	0.99987
	513.5	0.353827	0.861196		513.5	1.07118e-06	0.999601
	514	0.363082	0.853154		514	1.02097e-06	0.999192
	514.5	0.312239	0.84369		514.5	9.73204e-07	0.998641
	515	0.289521	0.834259		515	9.27759e-07	0.997947
	515.5	0.314232	0.826078		515.5	8.84518e-07	0.99711
	516	0.304351	0.819438		516	8.4337e-07	0.996127
	516.5	0.287739	0.814493		516.5	8.0421e-07	0.994998
	517	0.314048	0.811215		517	7.66938e-07	0.993722
	517.5	0.323705	0.809091		517.5	7.31459e-07	0.992298
	518	0.31823	0.808166		518	6.97684e-07	0.990725
	518.5	0.357406	0.808942		518.5	6.65528e-07	0.989003
	519	0.3865	0.811369		519	6.34911e-07	0.98713
	519.5	0.366785	0.815115		519.5	6.05755e-07	0.985106
	520	0.386971	0.820172		520	5.77989e-07	0.982931
	520.5	0.433065	0.825832		520.5	5.51544e-07	0.980605
	521	0.416291	0.831021		521	5.26355e-07	0.978127
	521.5	0.400334	0.835534		521.5	5.0236e-07	0.975496
	522	0.425654	0.839076		522	4.79499e-07	0.972714
	522.5	0.420678	0.840688		522.5	4.57719e-07	0.969781
	523	0.400887	0.840042		523	4.36965e-07	0.966696
	523.5	0.415083	0.837462		523.5	4.17188e-07	0.96346
	524	0.409681	0.833348		524	3.9834e-07	0.960073
	524.5	0.380165	0.828722		524.5	3.80375e-07	0.956536
	525	0.393494	0.82499		525	3.63251e-07	0.95285
	525.5	0.395567	0.822315		525.5	3.46928e-07	0.949015
	526	0.334547	0.8202		526	3.31365e-07	0.945032
	526.5	0.298563	0.818616		526.5	3.16527e-07	0.940902
	527	0.308738	0.817366		527	3.02379e-07	0.936627
	527.5	0.301085	0.81623		527.5	2.88886e-07	0.932207
	528	0.302811	0.815808		528	2.76019e-07	0.927644
	528.5	0.344286	0.816579		528.5	2.63746e-07	0.922939
	529	0.342279	0.817917		529	2.5204e-07	0.918094
	529.5	0.288719	0.81922		529.5	2.40873e-07	0.91311
	530	0.280373	0.820434		530	2.30219e-07	0.907989
	530.5	0.288129	0.820919		530.5	2.20054e-07	0.902733
	531	0.256951	0.820307		531	2.10356e-07	0.897345
	531.5	0.255898	0.819326		531.5	2.011e-07	0.891826
	532	0.286121	0.818413		532	1.92268e-07	0.88618
	532.5	0.268017	0.81734		532.5	1.83839e-07	0.880409
	533	0.237141	0.816205		533	1.75794e-07	0.874517
	533.5	0.2341	0.815105		533.5	1.68115e-07	0.868506
	534	0.208089	0.813836		534	1.60785e-07	0.862379
	534.5	0.1914	0.812917		534.5	1.53787e-07	0.856139
	535	0.233527	0.812914		535	1.47106e-07	0.84979
	535.5	0.253228	0.813197		535.5	1.40727e-07	0.843335
	536	0.233288	0.813146		536	1.34636e-07	0.836776
	536.5	0.254534	0.812556		536.5	1.2882e-07	0.830117
	537	0.286515	0.810816		537	1.23266e-07	0.823363
	537.5	0.282202	0.807629		537.5	1.17961e-07	0.816515
	538	0.308435	0.803792		538	1.12894e-07	0.809577
	538.5	0.366577	0.799933		538.5	1.08054e-07	0.802554
	539	0.38061	0.796081		539	1.0343e-07	0.795448
	539.5	0.374304	0.792554		539.5	9.9013e-08	0.788263
	540	0.393373	0.789598		540	9.47928e-08	0.781003
	540.5	0.399274	0.786902		540.5	9.07605e-08	0.773671
	541	0.390603	0.784483		541	8.69072e-08	0.76627
	541.5	0.415655	0.78275		541.5	8.32246e-08	0.758802
	542	0.441158	0.781676		542	7.97049e-08	0.751272
	542.5	0.430305	0.781082		542.5	7.63405e-08	0.74368
	543	0.432413	0.781159		543	7.31241e-08	0.736031
	543.5	0.450643	0.781603		543.5	7.00491e-08	0.728328
	544	0.438444	0.781696		544	6.71089e-08	0.720573
	544.5	0.426293	0.781458		544.5	6.42972e-08	0.712769
	545	0.439457	0.781121		545	6.16083e-08	0.704919
	545.5	0.437349	0.780587		545.5	5.90366e-08	0.697026
	546	0.432343	0.779979		546	5.65766e-08	0.689094
	546.5	0.461282	0.779493		546.5	5.42233e-08	0.681126
	547	0.475782	0.778853		547	5.19719e-08	0.673124
	547.5	0.454198	0.777969		547.5	4.98178e-08	0.665091
	548	0.456239	0.777208		548	4.77566e-08	0.657031
	548.5	0.472164	0.776515		548.5	4.5784e-08	0.648947
	549	0.461325	0.775742		549	4.38961e-08	0.640842
	549.5	0.45874	0.775174		549.5	4.20891e-08	0.632718
	550	0.471266	0.774814		550	4.03595e-08	0.62458
	550.5	0.455793	0.774369		550.5	3.87036e-08	0.616429
	551	0.436783	0.773905		551	3.71183e-08	0.60827
	551.5	0.450512	0.773567		551.5	3.56005e-08	0.600105
	552	0.436789	0.773004		552	3.41472e-08	0.591939
	552.5	0.388519	0.77208		552.5	3.27556e-08	0.583775
	553	0.389981	0.771062		553	3.14229e-08	0.575615
	553.5	0.415925	0.769735		553.5	3.01466e-08	0.567464
	554	0.4061	0.767745		554	2.89242e-08	0.559325
	554.5	0.398438	0.765259		554.5	2.77534e-08	0.551199
	555	0.406458	0.762409		555	2.66318e-08	0.543092
	555.5	0.398671	0.759074		555.5	2.55575e-08	0.535005
	556	0.405889	0.755361		556	2.45282e-08	0.526941
	556.5	0.442895	0.751384		556.5	2.35421e-08	0.518904
	557	0.446015	0.747055		557	2.25972e-08	0.510895
	557.5	0.430471	0.742694		557.5	2.16919e-08	0.502918
	558	0.447513	0.738715		558	2.08243e-08	0.494975
	558.5	0.453663	0.735028		558.5	1.99929e-08	0.487069
	559	0.440942	0.731625		559	1.9196e-08	0.479202
	559.5	0.450785	0.728751		559.5	1.84323e-08	0.471377
	560	0.457706	0.72628		560	1.77002e-08	0.463595
	560.5	0.430446	0.724002		560.5	1.69984e-08	0.455859
	561	0.407699	0.722054		561	1.63257e-08	0.448171
	561.5	0.401179	0.720398		561.5	1.56807e-08	0.440533
	562	0.379784	0.718694		562	1.50623e-08	0.432947
	562.5	0.363504	0.716751		562.5	1.44693e-08	0.425414
	563	0.369677	0.714476		563	1.39007e-08	0.417938
	563.5	0.376529	0.711841		563.5	1.33555e-08	0.410518
	564	0.378865	0.709006		564	1.28325e-08	0.403157
	564.5	0.387399	0.706124		564.5	1.23309e-08	0.395857
	565	0.393343	0.70301		565	1.18499e-08	0.388619
	565.5	0.388744	0.699423		565.5	1.13884e-08	0.381444
	566	0.408018	0.695545		566	1.09456e-08	0.374334
	566.5	0.448443	0.691477		566.5	1.05209e-08	0.367289
	567	0.461948	0.687086		567	1.01134e-08	0.360312
	567.5	0.459076	0.682566		567.5	9.72242e-09	0.353403
	568	0.470747	0.678246		568	9.34722e-09	0.346564
	568.5	0.473521	0.674151		568.5	8.98717e-09	0.339795
	569	0.460433	0.670307		569	8.64162e-09	0.333097
	569.5	0.468682	0.666933		569.5	8.30998e-09	0.326471
	570	0.463217	0.663857		570	7.99166e-09	0.319918
	570.5	0.411386	0.660941		570.5	7.6861e-09	0.313439
	571	0.385482	0.658605		571	7.39276e-09	0.307035
	571.5	0.388945	0.656767		571.5	7.11114e-09	0.300705
	572	0.360374	0.654967		572	6.84073e-09	0.29445
	572.5	0.340627	0.653409		572.5	6.58108e-09	0.288271
	573	0.357394	0.65227		573	6.33173e-09	0.282167
	573.5	0.352363	0.651199		573.5	6.09226e-09	0.27614
	574	0.343268	0.650155		574	5.86225e-09	0.270188
	574.5	0.369739	0.6492		574.5	5.6413e-09	0.264314
	575	0.366697	0.647925		575	5.42905e-09	0.258516
	575.5	0.33601	0.646405		575.5	5.22514e-09	0.252796
	576	0.353502	0.64524		576	5.02922e-09	0.247152
	576.5	0.368469	0.64447		576.5	4.84096e-09	0.241586
	577	0.331024	0.644128		577	4.66005e-09	0.236098
	577.5	0.31533	0.644717		577.5	4.48619e-09	0.230687
	578	0.325229	0.646251		578	4.31909e-09	0.225353
	578.5	0.295786	0.648368		578.5	4.15848e-09	0.220097
	579	0.267709	0.651175		579	4.00409e-09	0.214919
	579.5	0.275846	0.654711		579.5	3.85566e-09	0.209819
	580	0.25948	0.658554		580	3.71296e-09	0.204796
	580.5	0.230588	0.662628		580.5	3.57576e-09	0.19985
	581	0.254	0.667098		581	3.44384e-09	0.194983
	581.5	0.278494	0.671422		581.5	3.31698e-09	0.190193
	582	0.263393	0.67502		582	3.19499e-09	0.185481
	582.5	0.276785	0.67799		582.5	3.07767e-09	0.180846
	583	0.306655	0.680225		583	2.96484e-09	0.17629
	583.5	0.287567	0.681333		583.5	2.85632e-09	0.17181
	584	0.268845	0.681348		584	2.75194e-09	0.167409
	584.5	0.285747	0.680206		584.5	2.65153e-09	0.163084
	585	0.29288	0.677388		585	2.55495e-09	0.158837
	585.5	0.304664	0.67273		585.5	2.46203e-09	0.154666
	586	0.34257	0.666327		586	2.37264e-09	0.150572
	586.5	0.350974	0.658306		586.5	2.28664e-09	0.146554
	587	0.33654	0.649454		587	2.20389e-09	0.142612
	587.5	0.356368	0.640885		587.5	2.12427e-09	0.138746
	588	0.367596	0.632889		588	2.04765e-09	0.134955
	588.5	0.341603	0.625502		588.5	1.97392e-09	0.131239
	589	0.35318	0.619128		589	1.90297e-09	0.127597
	589.5	0.397757	0.61379		589.5	1.83468e-09	0.124029
	590	0.393456	0.609209		590	1.76895e-09	0.120535
	590.5	0.366268	0.605762		590.5	1.70568e-09	0.117113
	591	0.365048	0.603918		591	1.64478e-09	0.113764
	591.5	0.352085	0.603519		591.5	1.58615e-09	0.110486
	592	0.326739	0.604236		592	1.52971e-09	0.107279
	592.5	0.332685	0.605789		592.5	1.47537e-09	0.104143
	593	0.34569	0.607616		593	1.42305e-09	0.101076
	593.5	0.346508	0.609328		593.5	1.37267e-09	0.0980789
	594	0.370188	0.610848		594	1.32416e-09	0.0951497
	594.5	0.39016	0.611986		594.5	1.27744e-09	0.0922881
	595	0.369348	0.612659		595	1.23245e-09	0.0894933
	595.5	0.375725	0.613283		595.5	1.18911e-09	0.0867645
	596	0.424389	0.614025		596	1.14737e-09	0.0841011
	596.5	0.43042	0.614603		596.5	1.10716e-09	0.0815021
	597	0.41159	0.615229		597	1.06842e-09	0.0789668
	597.5	0.428852	0.616257		597.5	1.03111e-09	0.0764942
	598	0.432802	0.617285		598	9.95158e-10	0.0740837
	598.5	0.402156	0.617979		598.5	9.60518e-10	0.0717342
	599	0.388405	0.618583		599	9.27141e-10	0.069445
	599.5	0.384092	0.61922		599.5	8.94978e-10	0.0672151
	600	0.371569	0.61989		600	8.63984e-10	0.0650437
	600.5	0.371552	0.620792		600.5	8.34113e-10	0.0629297
	601	0.361679	0.621922		601	8.05323e-10	0.0608723
	601.5	0.324038	0.623148		601.5	7.77573e-10	0.0588705
	602	0.316986	0.624647		602	7.50823e-10	0.0569234
	602.5	0.348662	0.626358		602.5	7.25036e-10	0.0550299
	603	0.341633	0.627819		603	7.00175e-10	0.0531891
	603.5	0.308301	0.629134		603.5	6.76205e-10	0.0514001
	604	0.310961	0.630656		604	6.53093e-10	0.0496618
	604.5	0.313532	0.63208		604.5	6.30806e-10	0.0479733
	605	0.285257	0.633139		605	6.09313e-10	0.0463336
	605.5	0.265667	0.634003		605.5	5.88585e-10	0.0447418
	606	0.265185	0.634598		606	5.68593e-10	0.0431967
	606.5	0.260011	0.634694		606.5	5.4931e-10	0.0416976
	607	0.253755	0.634461		607	5.30708e-10	0.0402433
	607.5	0.246667	0.634093		607.5	5.12764e-10	0.038833
	608	0.224608	0.633555		608	4.95453e-10	0.0374656
	608.5	0.22082	0.633051		608.5	4.7875e-10	0.0361402
	609	0.254835	0.632754		609	4.62634e-10	0.0348558
	609.5	0.276705	0.63238		609.5	4.47084e-10	0.0336115
	610	0.28125	0.63184		610	4.32077e-10	0.0324063
	610.5	0.307915	0.631375		610.5	4.17595e-10	0.0312394
	611	0.331403	0.630897		611	4.03618e-10	0.0301097
	611.5	0.328457	0.630307		611.5	3.90129e-10	0.0290164
	612	0.338948	0.629851		612	3.77108e-10	0.0279585
	612.5	0.364992	0.629452		612.5	3.64541e-10	0.0269353
	613	0.370715	0.628777		613	3.52409e-10	0.0259457
	613.5	0.373053	0.627958		613.5	3.40698e-10	0.0249889
	614	0.386728	0.627204		614	3.29392e-10	0.0240641
	614.5	0.37321	0.626421		614.5	3.18477e-10	0.0231703
	615	0.345194	0.625796		615	3.07939e-10	0.0223068
	615.5	0.350029	0.625659		615.5	2.97765e-10	0.0214727
	616	0.349555	0.625827		616	2.8794e-10	0.0206672
	616.5	0.318006	0.626139		616.5	2.78453e-10	0.0198895
	617	0.307397	0.626824		617	2.69292e-10	0.0191387
	617.5	0.314302	0.627795		617.5	2.60445e-10	0.0184141
	618	0.304692	0.628785		618	2.51902e-10	0.017715
	618.5	0.311229	0.629899		618.5	2.4365e-10	0.0170405
	619	0.334716	0.63105		619	2.3568e-10	0.01639
	619.5	0.320972	0.63185		619.5	2.27982e-10	0.0157626
	620	0.310523	0.63233		620	2.20546e-10	0.0151577
	620.5	0.356945	0.632604		620.5	2.13363e-10	0.0145747
	621	0.381478	0.632228		621	2.06424e-10	0.0140127
	621.5	0.366894	0.631105		621.5	1.99721e-10	0.0134712
	622	0.394917	0.629705		622	1.93245e-10	0.0129495
	622.5	0.427299	0.627879		622.5	1.86989e-10	0.012447
	623	0.406025	0.625344		623	1.80945e-10	0.011963
	623.5	0.395325	0.622479		623.5	1.75105e-10	0.011497
	624	0.40258	0.6194		624	1.69463e-10	0.0110483
	624.5	0.364801	0.615779		624.5	1.64012e-10	0.0106164
	625	0.345237	0.611855		625	1.58744e-10	0.0102008
	625.5	0.38178	0.607909		625.5	1.53655e-10	0.00980081
	626	0.369521	0.603664		626	1.48737e-10	0.00941598
	626.5	0.324492	0.599403		626.5	1.43984e-10	0.00904576
	627	0.326933	0.595695		627	1.39391e-10	0.00868966
	627.5	0.310982	0.592266		627.5	1.34953e-10	0.00834718
	628	0.2596	0.589083		628	1.30664e-10	0.00801785
	628.5	0.267999	0.5868		628.5	1.26518e-10	0.0077012
	629	0.305562	0.585383		629	1.22511e-10	0.00739677
	629.5	0.305433	0.584519		629.5	1.18639e-10	0.00710414
	630	0.335834	0.584633		630	1.14896e-10	0.00682287
	630.5	0.386755	0.585787		630.5	1.11278e-10	0.00655255
	631	0.358762	0.587455		631	1.0778e-10	0.00629277
	631.5	0.318551	0.589776		631.5	1.04399e-10	0.00604314
	632	0.351273	0.592955		632	1.01129e-10	0.00580327
	632.5	0.383204	0.59641		632.5	9.7968e-11	0.0055728
	633	0.39376	0.599904		633	9.49108e-11	0.00535136
	633.5	0.432367	0.60363		633.5	9.19542e-11	0.00513861
	634	0.445146	0.607268		634	8.90945e-11	0.00493422
	634.5	0.402408	0.610638		634.5	8.63283e-11	0.00473788
	635	0.387085	0.614074		635	8.36524e-11	0.00454926
	635.5	0.393554	0.617462		635.5	8.10635e-11	0.00436809
	636	0.357209	0.620424		636	7.85587e-11	0.00419406
	636.5	0.344972	0.623201		636.5	7.6135e-11	0.0040269
	637	0.387457	0.625905		637	7.37896e-11	0.00386635
	637.5	0.393364	0.628101		637.5	7.15197e-11	0.00371216
	638	0.374245	0.629859		638	6.93229e-11	0.00356407
	638.5	0.390055	0.631514		638.5	6.71965e-11	0.00342184
	639	0.407562	0.63296		639	6.51382e-11	0.00328526
	639.5	0.413922	0.634122		639.5	6.31455e-11	0.00315409
	640	0.4401	0.63507		640	6.12164e-11	0.00302813
	640.5	0.449179	0.635698		640.5	5.93485e-11	0.00290717
	641	0.42104	0.636003		641	5.754e-11	0.00279103
	641.5	0.43287	0.636292		641.5	5.5789e-11	0.00267951
	642	0.478323	0.636459		642	5.40935e-11	0.00257245
	642.5	0.475152	0.636025		642.5	5.24518e-11	0.00246966
	643	0.465558	0.635126		643	5.08621e-11	0.00237098
	643.5	0.501999	0.633997		643.5	4.93228e-11	0.00227626
	644	0.517023	0.632235		644	4.78323e-11	0.00218534
	644.5	0.493229	0.62965		644.5	4.63889e-11	0.00209806
	645	0.493947	0.626577		645	4.49912e-11	0.0020143
	645.5	0.509327	0.623146		645.5	4.36377e-11	0.0019339
	646	0.505921	0.619338		646	4.23269e-11	0.00185674
	646.5	0.494084	0.615361		646.5	4.10576e-11	0.00178269
	647	0.468602	0.611431		647	3.98283e-11	0.00171162
	647.5	0.444328	0.607857		647.5	3.86377e-11	0.00164342
	648	0.458512	0.605022		648	3.74847e-11	0.00157798
	648.5	0.473232	0.602863		648.5	3.63679e-11	0.00151517
	649	0.429686	0.601125		649	3.52863e-11	0.00145491
	649.5	0.392945	0.600155		649.5	3.42387e-11	0.00139708
	650	0.42734	0.600294		650	3.3224e-11	0.0013416
	650.5	0.441325	0.600966		650.5	3.22412e-11	0.00128835
	651	0.401891	0.601695		651	3.12891e-11	0.00123726
	651.5	0.408929	0.602601		651.5	3.03667e-11	0.00118824
	652	0.466015	0.603347		652	2.9473e-11	0.00114119
	652.5	0.497135	0.603258		652.5	2.86071e-11	0.00109604
	653	0.504673	0.602227		653	2.77681e-11	0.00105271
	653.5	0.509834	0.600426		653.5	2.69549e-11	0.00101112
	654	0.487047	0.597907		654	2.61668e-11	0.000971211
	654.5	0.481965	0.595216		654.5	2.54029e-11	0.000932903
	655	0.526329	0.592931		655	2.46625e-11	0.000896134
	655.5	0.516879	0.590827		655.5	2.39447e-11	0.000860839
	656	0.469846	0.589173		656	2.32488e-11	0.00082696
	656.5	0.490823	0.588757		656.5	2.25741e-11	0.000794438
	657	0.506217	0.589465		657	2.19198e-11	0.000763218
	657.5	0.469987	0.591174		657.5	2.12854e-11	0.000733246
	658	0.478196	0.59438		658	2.06702e-11	0.000704471
	658.5	0.501875	0.598811		658.5	2.00735e-11	0.000676845
	659	0.460545	0.60381		659	1.94947e-11	0.000650321
	659.5	0.4454	0.609545		659.5	1.89334e-11	0.000624853
	660	0.486506	0.615796		660	1.83888e-11	0.0006004
	660.5	0.473403	0.621573		660.5	1.78605e-11	0.000576918
	661	0.452498	0.626751		661	1.7348e-11	0.000554371
	661.5	0.498158	0.631501		661.5	1.68508e-11	0.000532721
	662	0.516048	0.635335		662	1.63684e-11	0.000511931
	662.5	0.489884	0.638194		662.5	1.59004e-11	0.000491969
	663	0.497506	0.640454		663	1.54464e-11	0.0004728
	663.5	0.496881	0.642021		663.5	1.50059e-11	0.000454394
	664	0.464822	0.642989		664	1.45785e-11	0.000436719
	664.5	0.490884	0.643956		664.5	1.41638e-11	0.000419746
	665	0.540491	0.644817		665	1.37615e-11	0.000403448
	665.5	0.510075	0.645078		665.5	1.33711e-11	0.000387798
	666	0.47777	0.645171		666	1.29923e-11	0.000372769
	666.5	0.503346	0.645519		666.5	1.26247e-11	0.000358337
	667	0.48558	0.645647		667	1.22681e-11	0.000344478
	667.5	0.434494	0.645479		667.5	1.1922e-11	0.000331168
	668	0.444382	0.645513		668	1.15862e-11	0.000318386
	668.5	0.468459	0.645595		668.5	1.12603e-11	0.000306112
	669	0.469116	0.645466		669	1.09441e-11	0.000294323
	669.5	0.505186	0.645426		669.5	1.06372e-11	0.000283001
	670	0.541633	0.645347		670	1.03394e-11	0.000272128
	670.5	0.527194	0.644922		670.5	1.00504e-11	0.000261684
	671	0.555983	0.644611		671	9.7699e-12	0.000251654
	671.5	0.636122	0.644526		671.5	9.49765e-12	0.000242019
	672	0.654607	0.644137		672	9.2334e-12	0.000232764
	672.5	0.663223	0.643731		672.5	8.97689e-12	0.000223874
	673	0.730134	0.643696		673	8.7279e-12	0.000215334
	673.5	0.752683	0.643478		673.5	8.48618e-12	0.000207129
	674	0.717747	0.642994		674	8.25152e-12	0.000199246
	674.5	0.717296	0.642786		674.5	8.02368e-12	0.000191673
	675	0.708946	0.642575		675	7.80248e-12	0.000184396
	675.5	0.657546	0.642067		675.5	7.58769e-12	0.000177404
	676	0.644094	0.64172		676	7.37913e-12	0.000170685
	676.5	0.639152	0.641504		676.5	7.17661e-12	0.000164229
	677	0.574196	0.641051		677	6.97993e-12	0.000158024
	677.5	0.535414	0.640655		677.5	6.78893e-12	0.000152061
	678	0.557824	0.640444		678	6.60342e-12	0.00014633
	678.5	0.557878	0.640015		678.5	6.42325e-12	0.000140821
	679	0.552895	0.639455		679	6.24824e-12	0.000135527
	679.5	0.579368	0.638969		679.5	6.07826e-12	0.000130437
	680	0.572608	0.638213		680	5.91313e-12	0.000125545
	680.5	0.545508	0.6372		680.5	5.75272e-12	0.000120842
	681	0.582858	0.636311		681	5.59688e-12	0.00011632
	681.5	0.638682	0.635151		681.5	5.44549e-12	0.000111974
	682	0.647033	0.633088		682	5.29839e-12	0.000107794
	682.5	0.66148	0.630047		682.5	5.15548e-12	0.000103776
	683	0.690165	0.625782		683	5.01662e-12	9.9912e-05
	683.5	0.680204	0.619793		683.5	4.88169e-12	9.61967e-05
	684	0.662991	0.612066		684	4.75058e-12	9.26239e-05
	684.5	0.674533	0.602711		684.5	4.62318e-12	8.91882e-05
	685	0.67657	0.591554		685	4.49937e-12	8.58841e-05
	685.5	0.667159	0.578796		685.5	4.37904e-12	8.27063e-05
	686	0.675774	0.564992		686	4.26211e-12	7.965e-05
	686.5	0.6545	0.550376		686.5	4.14845e-12	7.67104e-05
	687	0.594556	0.535513		687	4.03799e-12	7.38829e-05
	687.5	0.58409	0.521559		687.5	3.93062e-12	7.1163e-05
	688	0.601412	0.509082		688	3.82626e-12	6.85466e-05
	688.5	0.563007	0.498235		688.5	3.72481e-12	6.60296e-05
	689	0.535792	0.489749		689	3.6262e-12	6.36082e-05
	689.5	0.567414	0.484081		689.5	3.53033e-12	6.12785e-05
	690	0.563769	0.480792		690	3.43713e-12	5.90371e-05
	690.5	0.529461	0.479742		690.5	3.34652e-12	5.68804e-05
	691	0.533373	0.480992		691	3.25843e-12	5.48053e-05
	691.5	0.53831	0.483978		691.5	3.17278e-12	5.28084e-05
	692	0.531484	0.488194		692	3.0895e-12	5.08868e-05
	692.5	0.543204	0.493324		692.5	3.00852e-12	4.90375e-05
	693	0.531763	0.498752		693	2.92978e-12	4.72577e-05
	693.5	0.492673	0.504127		693.5	2.85321e-12	4.55448e-05
	694	0.494919	0.509529		694	2.77875e-12	4.38962e-05
	694.5	0.490677	0.514602		694.5	2.70633e-12	4.23093e-05
	695	0.407146	0.518938		695	2.6359e-12	4.07818e-05
	695.5	0.338435	0.522909		695.5	2.56741e-12	3.93114e-05
	696	0.333896	0.526737		696	2.50079e-12	3.78958e-05
	696.5	0.311805	0.530018		696.5	2.43599e-12	3.65331e-05
	697	0.268517	0.532687		697	2.37296e-12	3.52211e-05
	697.5	0.251582	0.534957		697.5	2.31165e-12	3.39579e-05
	698	0.20684	0.487768		698	2.25201e-12	3.27416e-05
	698.5	0.165457	0.440199		698.5	2.194e-12	3.15704e-05
	699	0.135555	0.39225		699	2.13756e-12	3.04427e-05
	699.5	0.105112	0.343904		699.5	2.08265e-12	2.93566e-05
	700	0.07585	0.295188		700	2.02923e-12	2.83108e-05

## Sheet: Fig1C
		Colour Index
		DAWN		DUSK
	Solar Angle	MEAN	SD	MEAN	SD
	6.75	4.7013	0.608345	4.60596	0.458869
	6.25	4.68966	0.579954	4.56991	0.457809
	5.75	4.70028	0.513949	4.55817	0.436725
	5.25	4.73284	0.57638	4.59805	0.477982
	4.75	4.79107	0.581991	4.63516	0.413262
	4.25	4.84095	0.581496	4.67097	0.402457
	3.75	4.8824	0.581689	4.67194	0.43624
	3.25	4.91536	0.608888	4.64254	0.455909
	2.75	4.83116	0.587048	4.67274	0.439975
	2.25	4.74166	0.606734	4.66837	0.403483
	1.75	4.73016	0.753308	4.60241	0.42941
	1.25	4.67947	0.844586	4.49496	0.449533
	0.75	4.61361	0.844312	4.40175	0.435049
	0.25	4.57455	0.758872	4.3417	0.447767
	-0.25	4.49145	0.645179	4.24236	0.45172
	-0.75	4.3553	0.497315	4.18235	0.426524
	-1.25	4.16084	0.437119	4.09458	0.415333
	-1.75	4.01865	0.416538	3.96077	0.455392
	-2.25	3.8543	0.363923	3.83684	0.477433
	-2.75	3.64712	0.391519	3.67365	0.587753
	-3.25	3.41548	0.417667	3.46954	0.468355
	-3.75	3.22937	0.43329	3.20215	0.489482
	-4.25	2.83507	0.403295	2.93902	0.53061
	-4.75	2.66461	0.486918	2.6296	0.471403
	-5.25	2.35199	0.69954	2.47803	0.518025
	-5.75	2.08221	0.438457	2.05932	0.475358
	-6.25	1.8488	0.411937	1.99938	0.427225
	-6.75	1.54182	0.271605	1.69325	0.444393

## Sheet: Fig1D
			Scatter plot data					Histogram data
			Normalised Colour	Normalised brightness				Count	Count
	OBS	ANGLE	(MWS/UVS)	(MWS+UVS)			Normalised value (bin centre)	(MWS/UVS)	(MWS+UVS)
	1	-0.25	0.92365	1.29603			0.025	0	0
	1	-0.75	0.962147	1.27009			0.075	0	0
	1	-1.25	0.973881	1.3027			0.125	0	0
	1	-1.75	1.00037	1.33244			0.175	0	6
	1	-2.25	1.02414	1.27648			0.225	0	6
	1	-2.75	0.978125	1.32649			0.275	0	8
	1	-3.25	1.08301	1.30731			0.325	0	29
	1	-3.75	1.03084	1.20054			0.375	0	30
	1	-4.25	1.02213	1.23887			0.425	0	22
	1	-4.75	1.16377	0.962533			0.475	2	49
	1	-5.25	1.19568	1.02236			0.525	1	35
	1	-5.75	1.05854	1.09325			0.575	2	33
	1	-6.25	0.817339	1.25473			0.625	7	25
	1	-6.75	1.24664	1.20408			0.675	16	50
	2	-0.25	1.04478	0.585533			0.725	27	31
	2	-0.75	0.993615	0.842537			0.775	40	29
	2	-1.25	0.920851	0.87286			0.825	66	31
	2	-1.75	0.879125	0.654861			0.875	102	38
	2	-2.25	0.88767	0.625366			0.925	100	40
	2	-2.75	0.9407	0.625402			0.975	137	33
	2	-3.25	0.964756	0.907666			1.025	158	37
	2	-3.75	0.861283	1.00809			1.075	122	32
	2	-4.25	0.982947	0.946199			1.125	69	36
	2	-4.75	0.86386	1.28315			1.175	51	24
	2	-5.25	0.855939	1.09439			1.225	31	46
	2	-5.75	1.13695	1.07529			1.275	22	46
	2	-6.25	0.934183	0.867334			1.325	16	50
	2	-6.75	0.84844	0.671657			1.375	10	52
	3	-0.25	1.03454	1.49947			1.425	3	47
	3	-0.75	1.02715	1.50918			1.475	3	39
	3	-1.25	1.03815	1.4944			1.525	3	36
	3	-1.75	1.01316	1.55408			1.575	1	20
	3	-2.25	1.04581	1.4733			1.625	1	8
	3	-2.75	0.996031	1.45255			1.675	0	6
	3	-3.25	1.07246	1.44463			1.725	0	5
	3	-3.75	1.08422	1.48048			1.775	2	1
	3	-4.25	1.00535	1.59435			1.825	0	1
	3	-4.75	1.21038	1.33094			1.875	0	1
	3	-5.25	2.05749	0.829804			1.925	1	0
	3	-5.75	1.09925	1.32824			1.975	0	2
	3	-6.25	1.29701	0.834422			2.025	0	0
	3	-6.75	1.13203	1.21721			2.075	1	0
	4	-0.25	1.01127	1.47899			2.125	0	3
	4	-0.75	0.997714	1.50068			2.175	0	1
	4	-1.25	0.995355	1.45921			2.225	0	0
	4	-1.75	1.01363	1.38099			2.275	0	0
	4	-2.25	1.0346	1.4314			2.325	0	0
	4	-2.75	0.987073	1.46163			2.375	0	0
	4	-3.25	1.04958	1.45195			2.425	0	0
	4	-3.75	1.08709	1.40659			2.475	0	0
	4	-4.25	0.966347	1.49489			2.525	0	0
	4	-4.75	1.10505	1.46614			2.575	0	1
	4	-5.25	1.06801	1.55395			2.625	0	0
	4	-5.75	1.1763	1.08068			2.675	0	0
	4	-6.25	0.950282	1.04012			2.725	0	0
	4	-6.75	1.17679	1.18912			2.775	0	0
	5	-0.25	1.04355	1.51578			2.825	0	0
	5	-0.75	1.04008	1.41102			2.875	0	0
	5	-1.25	1.0119	1.41108			2.925	0	0
	5	-1.75	0.985308	1.42317			2.975	0	0
	5	-2.25	1.04796	1.37848			3.025	0	0
	5	-2.75	1.02033	1.39675			3.075	0	0
	5	-3.25	0.988842	1.39709			3.125	0	0
	5	-3.75	1.11848	1.30976			3.175	0	1
	5	-4.25	0.952016	1.61288			3.225	0	0
	5	-4.75	1.1753	1.20029			3.275	0	0
	5	-5.25	1.38808	1.13121			3.325	0	0
	5	-5.75	1.17163	1.12681			3.375	0	0
	5	-6.25	1.17027	0.76576			3.425	0	0
	5	-6.75	1.22184	0.924036			3.475	0	0
	6	-0.25	0.900466	1.01714			3.525	0	0
	6	-0.75	0.892434	0.995431			3.575	0	1
	6	-1.25	0.894795	0.97403			3.625	0	0
	6	-1.75	0.912258	0.954759			3.675	0	0
	6	-2.25	0.915362	0.87996			3.725	0	0
	6	-2.75	0.851937	0.884802			3.775	0	0
	6	-3.25	0.815835	0.935598			3.825	0	0
	6	-3.75	0.835625	0.747942			3.875	0	0
	6	-4.25	0.768616	0.627129			3.925	0	0
	6	-4.75	0.869379	0.558161			3.975	0	0
	6	-5.25	0.775925	0.574206			4.025	0	0
	6	-5.75	1.11836	0.624439			4.075	0	1
	6	-6.25	1.49755	0.914031			4.125	0	0
	6	-6.75	1.00353	1.05503			4.175	0	0
	7	-0.25	1.04225	0.462691			4.225	0	0
	7	-0.75	1.04858	0.484434			4.275	0	0
	7	-1.25	1.02389	0.507551			4.325	0	0
	7	-1.75	0.99073	0.506237			4.375	0	0
	7	-2.25	0.956928	0.453035			4.425	0	0
	7	-2.75	1.13555	0.46989			4.475	0	1
	7	-3.25	0.856479	0.565			4.525	0	1
	7	-3.75	0.970895	0.450363			4.575	0	0
	7	-4.25	0.896054	0.385211			4.625	0	0
	7	-4.75	0.861752	0.314232			4.675	0	0
	7	-5.25	0.893349	0.634135			4.725	0	0
	7	-5.75	0.872043	0.693868			4.775	0	0
	7	-6.25	0.930471	1.50375			4.825	0	0
	7	-6.75	0.824044	1.06493			4.875	0	0
	8	-0.25	0.933232	1.03856			4.925	0	0
	8	-0.75	0.975399	1.00675			4.975	0	0
	8	-1.25	0.992759	0.899334
	8	-1.75	1.0448	0.892574
	8	-2.25	0.97583	0.938959
	8	-2.75	0.901663	0.908593
	8	-3.25	0.921327	0.860001
	8	-3.75	1.07994	0.751343
	8	-4.25	0.767234	0.901235
	8	-4.75	0.843448	0.90093
	8	-5.25	0.823961	0.640876
	8	-5.75	1.1191	0.698385
	8	-6.25	0.745611	0.573375
	8	-6.75	1.07537	0.898499
	9	-0.25	1.01375	0.402181
	9	-0.75	1.0051	0.324054
	9	-1.25	1.00487	0.229308
	9	-1.75	0.960159	0.249376
	9	-2.25	1.06306	0.203776
	9	-2.75	0.890714	0.265458
	9	-3.25	0.808258	0.362816
	9	-3.75	0.75948	0.468506
	9	-4.25	0.823657	0.369756
	9	-4.75	0.733677	0.566821
	9	-5.25	0.765401	0.68265
	9	-5.75	0.668418	1.00886
	9	-6.25	0.947349	0.664769
	9	-6.75	0.887013	0.659341
	10	-0.25	1.03325	0.413672
	10	-0.75	0.961735	0.365503
	10	-1.25	0.846516	0.320361
	10	-1.75	0.876039	0.334143
	10	-2.25	0.965967	0.37507
	10	-2.75	0.830722	0.480451
	10	-3.25	0.747106	0.553653
	10	-3.75	0.814707	0.460868
	10	-4.25	0.754345	0.656723
	10	-4.75	0.780944	0.651516
	10	-5.25	0.627324	0.559568
	10	-5.75	0.791429	1.06191
	10	-6.25	0.745611	0.573375
	10	-6.75	0.887013	0.659341
	11	-0.25	1.03334	1.4157
	11	-0.75	1.04669	1.40389
	11	-1.25	1.03266	1.40627
	11	-1.75	1.04132	1.41314
	11	-2.25	1.06332	1.42421
	11	-2.75	0.986764	1.47842
	11	-3.25	1.06761	1.41567
	11	-3.75	0.976913	1.53646
	11	-4.25	1.05408	1.3006
	11	-4.75	0.988745	1.1492
	11	-5.25	1.07647	1.02649
	11	-5.75	0.897881	1.37295
	11	-6.25	1.02682	1.12717
	11	-6.75	1.13812	1.28267
	12	-0.25	1.02131	1.37999
	12	-0.75	1.0204	1.38575
	12	-1.25	1.06129	1.35317
	12	-1.75	1.02177	1.38854
	12	-2.25	1.05284	1.41509
	12	-2.75	1.05449	1.35589
	12	-3.25	1.0489	1.37882
	12	-3.75	1.17077	1.29483
	12	-4.25	0.984674	1.3181
	12	-4.75	1.17409	1.12852
	12	-5.25	1.28125	1.01488
	12	-5.75	1.10143	0.936725
	12	-6.25	0.92313	0.653798
	12	-6.75	1.04492	0.72849
	13	-0.25	1.01812	0.519429
	13	-0.75	0.976111	0.505272
	13	-1.25	0.959812	0.507421
	13	-1.75	1.02157	0.498449
	13	-2.25	1.03323	0.469595
	13	-2.75	1.20625	0.409834
	13	-3.25	0.923384	0.537973
	13	-3.75	0.845794	0.506669
	13	-4.25	0.976633	0.611147
	13	-4.75	0.889984	0.819297
	13	-5.25	0.619823	0.347151
	13	-5.75	0.832488	0.736823
	13	-6.25	0.745611	0.573375
	13	-6.75	0.843464	0.842785
	14	-0.25	1.31821	1.82143
	14	-0.75	1.31786	1.75677
	14	-1.25	1.26946	1.60392
	14	-1.75	1.23685	1.53461
	14	-2.25	1.22183	1.53203
	14	-2.75	1.1285	1.53394
	14	-3.25	1.16661	1.45624
	14	-3.75	1.1543	1.40323
	14	-4.25	1.11094	1.35696
	14	-4.75	1.23708	1.2525
	14	-5.25	1.26942	1.06138
	14	-5.75	1.37849	1.53297
	14	-6.25	1.32047	0.948595
	14	-6.75	1.12866	0.983946
	15	-0.25	1.05978	0.817714
	15	-0.75	1.01058	0.561093
	15	-1.25	0.968017	0.536795
	15	-1.75	0.940846	0.475117
	15	-2.25	0.97781	0.490066
	15	-2.75	1.01708	0.490416
	15	-3.25	0.837041	0.605819
	15	-3.75	1.02368	0.790419
	15	-4.25	1.02586	0.476189
	15	-4.75	1.16251	0.390479
	15	-5.25	0.973704	0.465956
	15	-5.75	0.819223	0.709397
	15	-6.25	1.09331	0.959742
	15	-6.75	1.12778	0.764777
	16	-0.25	1.08113	1.27888
	16	-0.75	1.16119	1.23421
	16	-1.25	1.18284	1.11743
	16	-1.75	1.17838	0.969473
	16	-2.25	1.04854	0.941691
	16	-2.75	1.16067	0.89137
	16	-3.25	1.0831	0.896416
	16	-3.75	1.1523	0.952819
	16	-4.25	1.20857	0.862776
	16	-4.75	1.10559	0.942404
	16	-5.25	1.08188	1.10341
	16	-5.75	1.00062	0.720685
	16	-6.25	0.586059	0.941582
	16	-6.75	0.914533	1.3194
	17	-0.25	0.909596	1.26767
	17	-0.75	0.948215	1.29405
	17	-1.25	0.977472	1.33224
	17	-1.75	1.02312	1.31606
	17	-2.25	0.995219	1.2967
	17	-2.75	0.958749	1.33108
	17	-3.25	1.02798	1.29725
	17	-3.75	0.955278	1.37896
	17	-4.25	1.11345	1.26374
	17	-4.75	1.3544	1.01118
	17	-5.25	1.0473	1.38452
	17	-5.75	1.0044	1.17957
	17	-6.25	0.953948	1.20558
	17	-6.75	0.982076	0.721801
	18	-0.25	1.07245	1.27961
	18	-0.75	1.05259	1.24296
	18	-1.25	1.01442	1.17732
	18	-1.75	1.01522	1.19691
	18	-2.25	1.04487	1.23415
	18	-2.75	0.972977	1.26119
	18	-3.25	1.11564	1.14893
	18	-3.75	1.01267	1.15302
	18	-4.25	1.17749	1.18116
	18	-4.75	1.283	0.994622
	18	-5.25	0.823996	1.37742
	18	-5.75	1.37945	0.715221
	18	-6.25	1.3442	1.53362
	18	-6.75	1.02802	0.721089
	19	-0.25	1.10013	1.38403
	19	-0.75	1.11045	1.43905
	19	-1.25	1.10086	1.44642
	19	-1.75	1.08294	1.3537
	19	-2.25	1.14028	1.35504
	19	-2.75	1.19306	1.306
	19	-3.25	1.16239	1.34401
	19	-3.75	1.10786	1.32853
	19	-4.25	0.980145	1.3265
	19	-4.75	1.21504	1.22065
	19	-5.25	1.2155	1.06195
	19	-5.75	1.08941	1.22953
	19	-6.25	1.02932	1.17113
	19	-6.75	0.997792	0.993663
	20	-0.25	0.835514	0.507043
	20	-0.75	0.863758	0.493785
	20	-1.25	0.911632	0.421825
	20	-1.75	0.85515	0.380275
	20	-2.25	0.763237	0.416141
	20	-2.75	0.774275	0.457313
	20	-3.25	0.715521	0.50814
	20	-3.75	0.86629	0.45229
	20	-4.25	0.8447	0.367605
	20	-4.75	0.794216	0.487618
	20	-5.25	0.766125	0.72397
	20	-5.75	0.658924	0.489611
	20	-6.25	1.2042	0.827697
	20	-6.75	0.777188	0.991154
	21	-0.25	1.56682	1.67169
	21	-0.75	1.43381	1.58784
	21	-1.25	1.30477	1.459
	21	-1.75	1.27308	1.37048
	21	-2.25	1.15982	1.2964
	21	-2.75	1.21991	1.22301
	21	-3.25	1.17072	1.2434
	21	-3.75	1.26424	1.25059
	21	-4.25	1.19251	1.40014
	21	-4.75	1.02069	1.29284
	21	-5.25	1.3592	1.20768
	21	-5.75	1.3037	0.686126
	21	-6.25	1.08409	1.9615
	21	-6.75	0.945694	0.685038
	22	-0.25	0.874802	0.357055
	22	-0.75	0.897291	0.377081
	22	-1.25	0.867985	0.354746
	22	-1.75	0.826594	0.399131
	22	-2.25	0.799128	0.395576
	22	-2.75	0.864737	0.361048
	22	-3.25	0.974087	0.272556
	22	-3.75	0.859233	0.333056
	22	-4.25	0.758362	0.497692
	22	-4.75	0.722614	0.29594
	22	-5.25	0.485123	0.468988
	22	-5.75	0.973921	0.671431
	22	-6.25	0.813811	1.1425
	22	-6.75	0.579874	0.80283
	23	-0.25	1.35666	1.15028
	23	-0.75	1.13015	1.37537
	23	-1.25	1.16161	1.60256
	23	-1.75	1.13067	1.69388
	23	-2.25	1.10654	1.64002
	23	-2.75	1.0603	1.58006
	23	-3.25	1.04951	1.49678
	23	-3.75	1.05912	1.47888
	23	-4.25	1.19207	1.2409
	23	-4.75	1.126	1.10027
	23	-5.25	1.11133	1.20687
	23	-5.75	0.953364	1.20366
	23	-6.25	1.0932	0.996755
	23	-6.75	0.887013	0.659341
	24	-0.25	0.986696	1.63739
	24	-0.75	0.989434	1.63049
	24	-1.25	0.991724	1.50159
	24	-1.75	0.949238	1.46525
	24	-2.25	0.977671	1.4304
	24	-2.75	0.977275	1.40914
	24	-3.25	1.00555	1.42789
	24	-3.75	1.08597	1.26593
	24	-4.25	0.987454	1.35325
	24	-4.75	0.983297	1.28687
	24	-5.25	0.823123	1.38974
	24	-5.75	0.779296	1.14653
	24	-6.25	0.983934	0.823343
	24	-6.75	1.15821	0.799906
	25	-0.25	1.03657	0.538463
	25	-0.75	0.959778	0.482575
	25	-1.25	0.89125	0.487045
	25	-1.75	0.91367	0.484361
	25	-2.25	0.961435	0.440015
	25	-2.75	0.851598	0.494235
	25	-3.25	1.06778	0.419338
	25	-3.75	0.758321	0.511876
	25	-4.25	1.01022	0.444861
	25	-4.75	1.21893	0.470192
	25	-5.25	0.868882	0.543771
	25	-5.75	1.41268	0.72798
	25	-6.25	0.745611	0.573375
	25	-6.75	0.475008	0.98434
	26	-0.25	1.0241	0.731505
	26	-0.75	1.05957	0.69345
	26	-1.25	1.03271	0.667095
	26	-1.75	1.09998	0.594591
	26	-2.25	0.961812	0.637087
	26	-2.75	1.04772	0.571552
	26	-3.25	1.21924	0.524534
	26	-3.75	1.15786	0.544749
	26	-4.25	0.868864	0.541685
	26	-4.75	1.07561	0.544969
	26	-5.25	0.754736	0.926777
	26	-5.75	0.901953	0.751385
	26	-6.25	1.03247	0.736489
	26	-6.75	0.887013	0.659341
	27	-0.25	1.06327	1.70437
	27	-0.75	1.06604	1.70461
	27	-1.25	1.09989	1.72004
	27	-1.75	1.08597	1.70472
	27	-2.25	1.12971	1.54266
	27	-2.75	1.12168	1.53095
	27	-3.25	1.07515	1.57509
	27	-3.75	1.09316	1.55751
	27	-4.25	1.03426	1.51128
	27	-4.75	1.12149	1.45683
	27	-5.25	1.27189	1.21454
	27	-5.75	1.07992	0.600186
	27	-6.25	0.684572	0.876696
	27	-6.75	0.928366	0.692531
	28	-0.25	1.02924	0.541393
	28	-0.75	1.05298	0.512302
	28	-1.25	1.03835	0.57188
	28	-1.75	0.990895	0.671052
	28	-2.25	1.06164	0.652629
	28	-2.75	0.991281	0.557402
	28	-3.25	0.942094	0.604618
	28	-3.75	0.826543	0.709202
	28	-4.25	1.27813	0.491848
	28	-4.75	1.10426	0.570478
	28	-5.25	0.85154	0.691854
	28	-5.75	0.894775	1.14263
	28	-6.25	0.807879	0.930416
	28	-6.75	0.962289	1.15507
	29	-0.25	0.9327	0.316531
	29	-0.75	0.959036	0.311252
	29	-1.25	0.989594	0.324526
	29	-1.75	1.12975	0.31428
	29	-2.25	0.894143	0.35977
	29	-2.75	0.911552	0.38678
	29	-3.25	0.847067	0.387082
	29	-3.75	1.05179	0.319544
	29	-4.25	0.798778	0.369893
	29	-4.75	0.741765	0.582454
	29	-5.25	0.677833	0.443461
	29	-5.75	0.662929	0.459579
	29	-6.25	0.655551	0.94496
	29	-6.75	0.887013	0.659341
	30	-0.25	1.1054	0.817521
	30	-0.75	0.970552	0.570124
	30	-1.25	0.922986	0.558545
	30	-1.75	0.918545	0.676364
	30	-2.25	0.927856	0.863462
	30	-2.75	0.963242	0.78754
	30	-3.25	0.98254	0.825753
	30	-3.75	0.835251	0.88644
	30	-4.25	0.893728	0.624576
	30	-4.75	0.796938	0.549022
	30	-5.25	0.633517	0.546854
	30	-5.75	0.615666	0.675862
	30	-6.25	0.803286	1.23025
	30	-6.75	0.832823	0.976602
	31	-0.25	0.819395	1.11786
	31	-0.75	0.860995	1.13334
	31	-1.25	0.896136	1.1763
	31	-1.75	0.88813	1.22101
	31	-2.25	0.896168	1.24432
	31	-2.75	0.9436	1.22288
	31	-3.25	0.87668	1.22618
	31	-3.75	0.912479	1.25564
	31	-4.25	0.873668	1.29544
	31	-4.75	0.843244	1.20906
	31	-5.25	0.988522	1.15613
	31	-5.75	1.20556	0.810354
	31	-6.25	0.909158	0.647468
	31	-6.75	0.74901	0.87885
	32	-0.25	1.0563	1.52746
	32	-0.75	1.02778	1.59748
	32	-1.25	1.02735	1.56938
	32	-1.75	1.01752	1.57228
	32	-2.25	1.01672	1.44252
	32	-2.75	0.981599	1.40713
	32	-3.25	0.942793	1.44549
	32	-3.75	1.002	1.41044
	32	-4.25	0.829233	1.4766
	32	-4.75	0.909938	1.30969
	32	-5.25	0.924756	1.09182
	32	-5.75	1.09765	0.762052
	32	-6.25	1.02095	1.06039
	32	-6.75	1.15807	1.73529
	33	-0.25	1.1365	1.38494
	33	-0.75	1.1621	1.39028
	33	-1.25	1.12513	1.35703
	33	-1.75	1.13689	1.35944
	33	-2.25	1.07047	1.28464
	33	-2.75	1.02422	1.24602
	33	-3.25	1.05425	1.16737
	33	-3.75	1.24742	0.904061
	33	-4.25	1.06951	0.777523
	33	-4.75	1.01601	0.986061
	33	-5.25	0.882781	0.916788
	33	-5.75	0.914274	0.556735
	33	-6.25	0.80603	0.600747
	33	-6.75	0.887013	0.659341
	34	-0.25	0.858635	1.27039
	34	-0.75	0.893293	1.39519
	34	-1.25	0.885196	1.3682
	34	-1.75	0.903554	1.35871
	34	-2.25	0.931335	1.41761
	34	-2.75	0.972961	1.43296
	34	-3.25	0.983798	1.40596
	34	-3.75	0.989502	1.29364
	34	-4.25	1.13854	1.19064
	34	-4.75	0.763043	1.29512
	34	-5.25	1.06458	0.863037
	34	-5.75	0.720842	1.33554
	34	-6.25	0.683324	1.20015
	34	-6.75	0.926411	1.5628
	35	-0.25	0.827981	0.81472
	35	-0.75	0.889055	0.851125
	35	-1.25	0.897168	0.712763
	35	-1.75	0.942749	0.742972
	35	-2.25	0.938796	0.859033
	35	-2.75	1.0066	0.920051
	35	-3.25	1.07234	0.883716
	35	-3.75	1.02132	0.895118
	35	-4.25	0.979107	0.955715
	35	-4.75	0.797016	0.919962
	35	-5.25	0.874738	0.895005
	35	-5.75	1.16139	1.12918
	35	-6.25	1.20843	1.0809
	35	-6.75	0.933016	1.3928
	36	-0.25	0.906478	0.907105
	36	-0.75	0.955125	0.928209
	36	-1.25	0.971574	0.96007
	36	-1.75	0.957435	0.983671
	36	-2.25	0.988807	0.987317
	36	-2.75	0.947421	1.00444
	36	-3.25	1.00188	1.01084
	36	-3.75	1.07758	1.03974
	36	-4.25	1.04118	0.950602
	36	-4.75	1.18155	1.00466
	36	-5.25	0.89428	1.10527
	36	-5.75	1.14393	1.2349
	36	-6.25	1.01532	1.34167
	36	-6.75	0.855439	1.14079
	37	-0.25	1.01935	1.56344
	37	-0.75	1.03711	1.57235
	37	-1.25	1.03007	1.51995
	37	-1.75	1.04593	1.44228
	37	-2.25	1.00662	1.56503
	37	-2.75	1.10178	1.46996
	37	-3.25	1.06382	1.57026
	37	-3.75	1.03537	1.58326
	37	-4.25	1.09015	1.53027
	37	-4.75	1.0068	1.39602
	37	-5.25	1.06695	1.05844
	37	-5.75	1.22041	1.58695
	37	-6.25	0.988465	0.91695
	37	-6.75	0.887013	0.659341
	38	-0.25	0.898471	1.28253
	38	-0.75	0.916883	1.28234
	38	-1.25	0.927784	1.32526
	38	-1.75	0.932393	1.3762
	38	-2.25	0.953731	1.33529
	38	-2.75	0.960708	1.37923
	38	-3.25	0.981307	1.3796
	38	-3.75	0.986526	1.28977
	38	-4.25	1.08523	1.18979
	38	-4.75	1.11613	0.981239
	38	-5.25	1.08408	1.36922
	38	-5.75	1.75795	0.860582
	38	-6.25	1.25383	1.31236
	38	-6.75	0.858474	1.17285
	39	-0.25	1.09646	1.53195
	39	-0.75	1.07889	1.50679
	39	-1.25	1.08453	1.53818
	39	-1.75	1.00623	1.41985
	39	-2.25	1.02423	1.41588
	39	-2.75	1.01308	1.49172
	39	-3.25	1.08261	1.38671
	39	-3.75	1.08111	1.41791
	39	-4.25	1.01536	1.53524
	39	-4.75	1.12177	1.40836
	39	-5.25	1.16588	1.34251
	39	-5.75	1.06596	1.32934
	39	-6.25	1.26187	1.4111
	39	-6.75	1.10634	1.37023
	40	-0.25	0.888802	1.04836
	40	-0.75	0.897415	1.12775
	40	-1.25	0.932929	1.2029
	40	-1.75	0.963889	1.30119
	40	-2.25	0.985201	1.2721
	40	-2.75	0.983697	1.26144
	40	-3.25	0.982396	1.21356
	40	-3.75	1.02253	1.17845
	40	-4.25	0.945527	1.1259
	40	-4.75	1.15214	1.14496
	40	-5.25	0.870645	1.50306
	40	-5.75	0.96345	1.51512
	40	-6.25	1.29948	1.29578
	40	-6.75	0.931926	0.679008
	41	-0.25	1.11906	1.29281
	41	-0.75	1.1612	1.3181
	41	-1.25	1.18514	1.34978
	41	-1.75	1.23415	1.38587
	41	-2.25	1.2665	1.433
	41	-2.75	1.28886	1.46997
	41	-3.25	1.2294	1.35269
	41	-3.75	1.30936	1.25394
	41	-4.25	1.22842	1.38054
	41	-4.75	1.01999	1.53696
	41	-5.25	1.308	1.14144
	41	-5.75	1.05263	1.05626
	41	-6.25	1.31294	0.830398
	41	-6.75	1.09301	0.992385
	42	-0.25	1.06912	1.531
	42	-0.75	1.05691	1.5214
	42	-1.25	1.05412	1.44031
	42	-1.75	1.01562	1.46352
	42	-2.25	1.08083	1.46102
	42	-2.75	1.01598	1.41324
	42	-3.25	1.09183	1.41104
	42	-3.75	1.0665	1.41069
	42	-4.25	1.13032	1.33763
	42	-4.75	1.04604	1.32603
	42	-5.25	1.21608	1.00345
	42	-5.75	1.01719	1.49477
	42	-6.25	1.43947	0.887721
	42	-6.75	1.14734	1.35257
	43	-0.25	1.00923	0.835008
	43	-0.75	1.01342	0.770978
	43	-1.25	1.0172	0.846504
	43	-1.75	1.01425	1.07853
	43	-2.25	1.0267	1.18506
	43	-2.75	1.04652	1.18113
	43	-3.25	1.0083	1.21287
	43	-3.75	0.932348	1.30927
	43	-4.25	1.18607	1.18891
	43	-4.75	1.11031	1.12937
	43	-5.25	1.10941	1.13601
	43	-5.75	0.993686	1.06609
	43	-6.25	0.956705	0.669008
	43	-6.75	1.79231	1.05578
	44	-0.25	0.923116	0.220755
	44	-0.75	0.864352	0.196272
	44	-1.25	0.780256	0.190512
	44	-1.75	0.730904	0.178671
	44	-2.25	0.752559	0.205737
	44	-2.75	0.680615	0.208397
	44	-3.25	0.826024	0.151081
	44	-3.75	0.936446	0.187585
	44	-4.25	0.946292	0.268168
	44	-4.75	0.721289	0.514239
	44	-5.25	0.614458	0.34535
	44	-5.75	0.692363	0.451346
	44	-6.25	0.745611	0.573375
	44	-6.75	0.887013	0.659341
	45	-0.25	0.90505	0.774036
	45	-0.75	0.93855	0.798423
	45	-1.25	0.932101	0.817793
	45	-1.75	0.963173	0.845851
	45	-2.25	0.93612	0.821686
	45	-2.75	0.877302	0.874684
	45	-3.25	1.05753	0.824515
	45	-3.75	0.870766	1.10061
	45	-4.25	0.880597	1.20051
	45	-4.75	1.08192	0.951937
	45	-5.25	0.917468	1.39913
	45	-5.75	0.881503	1.23263
	45	-6.25	1.31569	1.13112
	45	-6.75	1.08454	1.49561
	46	-0.25	1.08495	1.47702
	46	-0.75	1.08615	1.48318
	46	-1.25	1.10912	1.47213
	46	-1.75	1.12425	1.47652
	46	-2.25	1.1114	1.522
	46	-2.75	1.17963	1.45705
	46	-3.25	1.19281	1.4397
	46	-3.75	1.12485	1.503
	46	-4.25	1.2607	2.58487
	46	-4.75	1.39102	4.49458
	46	-5.25	1.52345	4.50233
	46	-5.75	1.50691	4.08898
	46	-6.25	1.50132	3.55308
	46	-6.75	1.45088	3.17757
	47	-0.25	0.920839	0.656152
	47	-0.75	0.93875	0.534322
	47	-1.25	0.962314	0.582486
	47	-1.75	0.984372	0.54171
	47	-2.25	0.974058	0.501514
	47	-2.75	0.867184	0.496314
	47	-3.25	0.761686	0.522618
	47	-3.75	1.12382	0.456397
	47	-4.25	0.883706	0.616661
	47	-4.75	0.871799	0.630045
	47	-5.25	0.912568	0.790388
	47	-5.75	0.792476	0.88514
	47	-6.25	0.745611	0.573375
	47	-6.75	0.887013	0.659341
	48	-0.25	0.822753	0.36835
	48	-0.75	0.83734	0.399099
	48	-1.25	0.861389	0.368808
	48	-1.75	0.827887	0.355121
	48	-2.25	0.801321	0.375091
	48	-2.75	0.826002	0.372902
	48	-3.25	0.970317	0.410437
	48	-3.75	0.831896	0.337938
	48	-4.25	0.757218	0.334772
	48	-4.75	0.62052	0.672843
	48	-5.25	0.66629	0.492759
	48	-5.75	0.953145	0.62623
	48	-6.25	0.949995	1.03788
	48	-6.75	0.887013	0.659341
	49	-0.25	0.960648	0.771878
	49	-0.75	0.938711	0.814566
	49	-1.25	0.990124	0.83993
	49	-1.75	0.982415	0.935266
	49	-2.25	1.03514	0.937784
	49	-2.75	0.883882	0.844391
	49	-3.25	1.1424	0.54175
	49	-3.75	1.057	0.461018
	49	-4.25	0.930123	0.474657
	49	-4.75	0.946369	0.536463
	49	-5.25	0.927713	0.610903
	49	-5.75	1.06874	0.59589
	49	-6.25	0.821825	1.39747
	49	-6.75	1.0352	1.40701
	50	-0.25	0.907898	1.08397
	50	-0.75	0.932052	1.04793
	50	-1.25	0.947757	1.02501
	50	-1.75	0.98668	0.973208
	50	-2.25	0.90948	0.997038
	50	-2.75	1.03596	0.890975
	50	-3.25	1.01071	0.872655
	50	-3.75	1.06401	0.879892
	50	-4.25	1.18031	0.705417
	50	-4.75	0.996657	0.908166
	50	-5.25	0.882014	1.18299
	50	-5.75	0.902204	0.673032
	50	-6.25	1.00358	0.868258
	50	-6.75	1.61468	1.18369
	51	-0.25	0.845393	0.598635
	51	-0.75	0.891744	0.590474
	51	-1.25	0.899447	0.528499
	51	-1.75	0.907914	0.510069
	51	-2.25	0.974028	0.467764
	51	-2.75	1.02549	0.433816
	51	-3.25	0.827409	0.530667
	51	-3.75	0.820427	0.543074
	51	-4.25	1.16499	0.481683
	51	-4.75	0.77782	0.609955
	51	-5.25	0.83949	0.660091
	51	-5.75	0.692363	0.451346
	51	-6.25	0.99695	0.687241
	51	-6.75	1.0549	1.29031
	52	-0.25	1.01177	1.33596
	52	-0.75	1.00258	1.3016
	52	-1.25	1.03009	1.31787
	52	-1.75	1.05012	1.32293
	52	-2.25	1.0432	1.28833
	52	-2.75	1.09222	1.2338
	52	-3.25	1.06085	1.29316
	52	-3.75	1.24221	1.13718
	52	-4.25	1.07056	1.21085
	52	-4.75	1.21673	0.918876
	52	-5.25	1.47442	0.964791
	52	-5.75	1.1358	0.875425
	52	-6.25	1.26172	1.00552
	52	-6.75	0.887013	0.659341
	53	-0.25	1.08071	0.917433
	53	-0.75	1.06359	0.889256
	53	-1.25	1.0462	0.958939
	53	-1.75	1.04649	1.03364
	53	-2.25	1.09155	1.05736
	53	-2.75	1.10755	1.02813
	53	-3.25	1.03048	1.00877
	53	-3.75	1.07287	1.02241
	53	-4.25	1.03794	1.04644
	53	-4.75	1.09538	1.14516
	53	-5.25	1.03648	0.859629
	53	-5.75	0.944446	0.548157
	53	-6.25	0.999433	1.30946
	53	-6.75	1.92099	1.32431
	54	-0.25	0.98608	1.14591
	54	-0.75	0.969449	1.14626
	54	-1.25	0.996275	1.17322
	54	-1.75	1.02738	1.2002
	54	-2.25	1.0241	1.1983
	54	-2.75	0.996328	1.23646
	54	-3.25	1.16088	1.11021
	54	-3.75	1.23413	1.22928
	54	-4.25	1.23715	1.20096
	54	-4.75	0.929834	1.42089
	54	-5.25	1.33375	1.3271
	54	-5.75	0.919836	0.538706
	54	-6.25	0.745611	0.573375
	54	-6.75	0.949219	0.686581
	55	-0.25	1.12558	1.26394
	55	-0.75	1.12129	1.22673
	55	-1.25	1.18236	1.10019
	55	-1.75	1.21634	1.19999
	55	-2.25	1.23528	1.43052
	55	-2.75	1.29824	1.50002
	55	-3.25	1.07479	1.51545
	55	-3.75	1.12183	1.50846
	55	-4.25	1.26118	1.28523
	55	-4.75	1.07013	1.45631
	55	-5.25	0.958971	1.33398
	55	-5.75	1.17831	0.890229
	55	-6.25	0.969288	0.822485
	55	-6.75	0.887013	0.659341
	56	-0.25	1.171	1.60053
	56	-0.75	1.1581	1.68174
	56	-1.25	1.13811	1.6774
	56	-1.75	1.22327	1.57771
	56	-2.25	1.26202	1.68877
	56	-2.75	1.29789	1.99641
	56	-3.25	1.38049	2.12788
	56	-3.75	1.15038	2.18877
	56	-4.25	1.24995	2.14303
	56	-4.75	1.37502	1.85266
	56	-5.25	1.17352	2.11482
	56	-5.75	1.10409	1.55784
	56	-6.25	1.34604	1.11199
	56	-6.75	0.887013	0.659341
	57	-0.25	0.873007	0.286006
	57	-0.75	0.896353	0.317534
	57	-1.25	0.983466	0.409773
	57	-1.75	0.960817	0.366098
	57	-2.25	0.735631	0.335441
	57	-2.75	0.899751	0.336062
	57	-3.25	0.765875	0.478593
	57	-3.75	0.771291	0.322718
	57	-4.25	0.517508	0.414271
	57	-4.75	0.791333	0.312144
	57	-5.25	0.702751	0.409173
	57	-5.75	0.692363	0.451346
	57	-6.25	0.664188	0.718986
	57	-6.75	0.801967	0.765332
	58	-0.25	1.00654	1.41988
	58	-0.75	1.01563	1.42306
	58	-1.25	0.996106	1.53156
	58	-1.75	1.05928	1.50276
	58	-2.25	1.05435	1.45212
	58	-2.75	0.993945	1.45689
	58	-3.25	1.0743	1.38255
	58	-3.75	0.968253	1.44807
	58	-4.25	1.12281	1.41228
	58	-4.75	1.27956	1.30131
	58	-5.25	1.11851	1.24415
	58	-5.75	1.33532	0.904265
	58	-6.25	1.07005	0.753645
	58	-6.75	0.752071	1.22261
	59	-0.25	1.0615	0.60571
	59	-0.75	1.06062	0.707886
	59	-1.25	1.09033	0.814276
	59	-1.75	1.00389	0.885954
	59	-2.25	1.07679	0.818747
	59	-2.75	1.03034	0.842058
	59	-3.25	1.02955	0.786964
	59	-3.75	1.02221	0.797607
	59	-4.25	0.899548	0.798638
	59	-4.75	0.751084	0.423776
	59	-5.25	0.89936	0.710163
	59	-5.75	0.71737	1.33015
	59	-6.25	1.178	0.789213
	59	-6.75	1.077	0.74254
	60	-0.25	0.92133	0.591428
	60	-0.75	0.938392	0.636829
	60	-1.25	1.00081	0.665852
	60	-1.75	0.965654	0.7192
	60	-2.25	1.00857	0.733705
	60	-2.75	0.925963	0.787703
	60	-3.25	1.01257	0.740697
	60	-3.75	0.992671	0.779646
	60	-4.25	1.04695	0.745873
	60	-4.75	0.838514	0.82451
	60	-5.25	0.779932	0.72883
	60	-5.75	0.819528	1.36463
	60	-6.25	1.11192	1.14611
	60	-6.75	0.887013	0.659341
	61	-0.25	1.04162	0.782683
	61	-0.75	1.00244	0.786852
	61	-1.25	0.985566	0.735915
	61	-1.75	0.934856	0.742477
	61	-2.25	0.970854	0.742497
	61	-2.75	0.964291	0.72712
	61	-3.25	0.963179	0.720475
	61	-3.75	1.04436	0.78848
	61	-4.25	1.00497	0.914386
	61	-4.75	0.929794	0.808677
	61	-5.25	0.770242	1.23854
	61	-5.75	0.81498	0.498437
	61	-6.25	0.78134	0.648366
	61	-6.75	1.04726	1.38486
	62	-0.25	1.07066	1.48217
	62	-0.75	1.07258	1.41278
	62	-1.25	1.00959	1.39156
	62	-1.75	1.00052	1.33865
	62	-2.25	1.02086	1.33736
	62	-2.75	1.05943	1.23806
	62	-3.25	0.963267	1.32428
	62	-3.75	1.15888	1.09195
	62	-4.25	1.04391	1.14399
	62	-4.75	1.00577	1.03635
	62	-5.25	1.32004	1.08065
	62	-5.75	0.990561	1.306
	62	-6.25	0.965725	0.860301
	62	-6.75	1.22544	1.05037
	63	-0.25	0.995461	0.34917
	63	-0.75	1.02373	0.345744
	63	-1.25	1.00125	0.310054
	63	-1.75	0.998549	0.323195
	63	-2.25	0.864465	0.327103
	63	-2.75	0.735371	0.41569
	63	-3.25	0.910707	0.333349
	63	-3.75	0.647415	0.405388
	63	-4.25	0.738399	0.461752
	63	-4.75	0.979308	0.386132
	63	-5.25	0.932128	0.451998
	63	-5.75	1.10402	0.885793
	63	-6.25	0.984634	0.993971
	63	-6.75	0.887013	0.659341
	64	-0.25	0.897465	0.494114
	64	-0.75	0.867511	0.424388
	64	-1.25	0.845168	0.395832
	64	-1.75	0.812241	0.347976
	64	-2.25	0.865669	0.349669
	64	-2.75	0.748126	0.42168
	64	-3.25	0.903243	0.442571
	64	-3.75	0.698914	0.516748
	64	-4.25	0.694477	0.591514
	64	-4.75	0.713052	0.63783
	64	-5.25	1.12731	0.639446
	64	-5.75	0.901282	1.02301
	64	-6.25	0.995817	0.686727
	64	-6.75	1.03619	1.08458
	65	-0.25	1.05357	1.14859
	65	-0.75	1.07329	1.39186
	65	-1.25	1.05926	1.47765
	65	-1.75	1.0556	1.49879
	65	-2.25	1.0986	1.49896
	65	-2.75	1.13183	1.53032
	65	-3.25	1.11126	1.60376
	65	-3.75	1.00422	1.50762
	65	-4.25	1.19169	1.27077
	65	-4.75	0.904258	1.46545
	65	-5.25	1.09178	1.25325
	65	-5.75	0.956299	0.909902
	65	-6.25	0.811128	1.53318
	65	-6.75	0.686789	0.902075
	66	-0.25	0.795181	0.999036
	66	-0.75	0.835076	1.0037
	66	-1.25	0.856917	1.03584
	66	-1.75	0.868099	1.01262
	66	-2.25	0.827361	0.906104
	66	-2.75	0.809773	0.926944
	66	-3.25	0.8511	0.956128
	66	-3.75	0.904198	1.05634
	66	-4.25	0.832467	1.04637
	66	-4.75	1.01366	1.01139
	66	-5.25	1.14811	0.784289
	66	-5.75	0.748728	1.5885
	66	-6.25	0.745611	0.573375
	66	-6.75	1.00966	1.30816
	67	-0.25	0.844583	0.687677
	67	-0.75	0.895283	0.786163
	67	-1.25	0.945734	0.947082
	67	-1.75	0.923369	1.04692
	67	-2.25	0.916741	1.07048
	67	-2.75	0.907087	1.05376
	67	-3.25	1.04117	0.936167
	67	-3.75	0.935517	1.09685
	67	-4.25	1.09723	0.963068
	67	-4.75	0.996288	0.842047
	67	-5.25	1.04595	0.792263
	67	-5.75	1.27229	0.903438
	67	-6.25	1.34814	0.880455
	67	-6.75	0.887013	0.659341
	68	-0.25	0.821424	0.427492
	68	-0.75	0.833748	0.42213
	68	-1.25	0.820843	0.457948
	68	-1.75	0.815776	0.463126
	68	-2.25	0.963451	0.468607
	68	-2.75	0.881238	0.58012
	68	-3.25	0.902739	0.630282
	68	-3.75	0.715504	0.700512
	68	-4.25	0.9307	0.769875
	68	-4.75	0.864186	0.945779
	68	-5.25	0.961491	0.952182
	68	-5.75	0.829537	1.04883
	68	-6.25	0.903513	0.694403
	68	-6.75	0.895124	1.10954
	69	-0.25	0.773328	0.314933
	69	-0.75	0.761812	0.273562
	69	-1.25	0.829853	0.361977
	69	-1.75	0.855695	0.301827
	69	-2.25	0.906474	0.251855
	69	-2.75	1.36267	0.173785
	69	-3.25	0.755385	0.289758
	69	-3.75	0.915322	0.359579
	69	-4.25	0.715651	0.469904
	69	-4.75	1.0837	0.370499
	69	-5.25	0.808427	0.487803
	69	-5.75	0.959438	0.553915
	69	-6.25	0.95946	0.670256
	69	-6.75	0.887013	0.659341
	70	-0.25	0.996131	1.01228
	70	-0.75	1.05972	1.04624
	70	-1.25	1.09409	1.08726
	70	-1.75	1.0601	1.05194
	70	-2.25	1.0434	1.04592
	70	-2.75	1.028	0.989881
	70	-3.25	0.955419	0.918228
	70	-3.75	0.964019	1.06526
	70	-4.25	1.18008	0.843559
	70	-4.75	0.865817	0.850438
	70	-5.25	1.05377	1.06994
	70	-5.75	0.840539	1.31726
	70	-6.25	1.02336	1.34652
	70	-6.75	1.01727	1.37918
	71	-0.25	0.990086	1.22895
	71	-0.75	1.04055	1.24447
	71	-1.25	1.08885	1.33735
	71	-1.75	1.14448	1.35902
	71	-2.25	1.07211	1.39815
	71	-2.75	1.07189	1.35722
	71	-3.25	1.10287	1.289
	71	-3.75	1.02261	1.3262
	71	-4.25	1.08096	1.29756
	71	-4.75	1.08137	1.24298
	71	-5.25	1.0851	1.06005
	71	-5.75	0.978125	1.28115
	71	-6.25	0.931299	1.65499
	71	-6.75	1.31673	1.27285

## Sheet: Opticalpowervs.Angle
		Log[total optical power (W/m2)]
	OBSERVATION	1	2	3	4	5	6	7	8	9	10	11	12	13	14	15	16	17	18	19	20	21	22	23	24	25	26	27	28	29	30	31	32	33	34	35	36	37	38	39	40	41	42	43	44	45	46	47	48
	Solar Angle
	6.75	1.66189	0.841396	1.51381	1.50801	1.56041	1.35618	1.06748	1.27319	1.25918	0.949012	1.42658	1.52696	0.983285	1.65837	1.17263	1.4593	1.51033	1.20368	1.42198	1.48722	1.3811	0.86833	1.13261	1.59526	1.14395	1.34251	1.53462	1.23523	0.802866	0.97087	1.50694	1.40561	1.27921	1.56685	1.11423	1.51324	1.45464	1.54452	1.50558	1.51495	1.53792	1.51212	1.05742	0.704814	1.46378	1.49047	1.03114	1.1407
	6.25	1.57971	0.689096	1.47473	1.51677	1.52713	1.28523	1.02331	1.30563	1.21557	0.888363	1.40072	1.48056	0.920106	1.61848	1.21795	1.41639	1.47996	1.21276	1.38912	1.47661	1.32981	0.831733	1.30376	1.5716	1.11071	1.30951	1.50701	1.1882	0.792336	0.967624	1.47288	1.38259	1.31655	1.57564	1.10197	1.4651	1.42555	1.51393	1.47431	1.45458	1.50384	1.48108	1.08599	0.692463	1.43663	1.44946	1.07689	1.05563
	5.75	1.49928	0.622143	1.43842	1.49568	1.49435	1.26592	0.962405	1.26742	1.18504	0.850009	1.37239	1.43038	0.858977	1.57675	1.21115	1.36916	1.44718	1.20437	1.36372	1.44751	1.29588	0.85723	1.2569	1.52224	1.09477	1.28366	1.47878	1.12927	0.700764	1.00009	1.42695	1.40416	1.34686	1.53603	1.16942	1.3897	1.40592	1.48316	1.4211	1.44165	1.46437	1.44507	1.12202	0.677805	1.40247	1.41106	0.913915	0.97558
	5.25	1.41246	0.763228	1.39634	1.46378	1.45799	1.27109	0.910626	1.2147	1.1571	0.839452	1.3423	1.38419	0.811261	1.53087	1.10051	1.3057	1.41116	1.18785	1.35187	1.38237	1.23484	0.848479	1.16552	1.43462	1.10475	1.22591	1.44782	1.09573	0.69106	0.921937	1.38138	1.41928	1.28947	1.37554	1.22585	1.34893	1.39307	1.44038	1.42866	1.43049	1.43723	1.40504	1.10346	0.617534	1.36329	1.37443	0.969739	0.972324
	4.75	1.35904	0.654987	1.35551	1.4266	1.41627	1.18818	0.905816	1.17484	1.21632	0.742448	1.30556	1.33611	0.769305	1.48617	1.03297	1.25516	1.36586	1.17015	1.32192	1.30038	1.14165	0.762476	1.21019	1.39725	1.12019	1.15935	1.40812	1.09444	0.647784	0.857386	1.34173	1.36261	1.25768	1.21838	1.16592	1.35601	1.38043	1.39091	1.39812	1.3905	1.37901	1.36269	0.990372	0.567971	1.31361	1.33797	1.07745	0.92828
	4.25	1.34032	0.414239	1.31301	1.39239	1.36809	1.08139	0.879465	1.12453	1.18783	0.643333	1.26515	1.29907	0.71982	1.43215	0.881598	1.2169	1.32208	1.10778	1.28777	1.24105	1.07215	0.647931	1.26301	1.35437	1.08793	1.08866	1.36984	1.03502	0.637395	0.884004	1.28977	1.34212	1.26115	1.10209	1.12529	1.31972	1.28453	1.33713	1.34984	1.32185	1.33294	1.32583	0.863448	0.541403	1.25532	1.30261	1.15156	0.929983
	3.75	1.32251	0.31872	1.26843	1.34947	1.31956	1.05363	0.790512	1.06774	1.16667	0.506094	1.22359	1.2325	0.69694	1.38954	0.870284	1.18508	1.27567	1.05119	1.2331	1.17735	1.02453	0.567813	1.15597	1.33395	1.01247	1.04619	1.32799	0.962923	0.579111	1.02646	1.22407	1.32622	1.17743	0.997942	1.07044	1.23002	1.21293	1.27963	1.29308	1.25282	1.28922	1.27963	0.895585	0.456395	1.18027	1.25886	1.03474	0.835492
	3.25	1.28638	0.517363	1.21869	1.30237	1.26289	1.05232	0.692294	1.02693	1.05769	0.491395	1.17396	1.16727	0.69198	1.3394	0.985184	1.12632	1.21327	1.06332	1.19604	1.1054	0.984959	0.542781	1.00532	1.30706	0.940504	0.985277	1.27888	0.905765	0.5283	1.15544	1.14862	1.26487	1.18721	0.873412	1.01775	1.15189	1.17962	1.21574	1.23163	1.17401	1.20942	1.22537	0.814882	0.345122	1.10121	1.20947	0.907769	0.782802
	2.75	1.20671	0.499591	1.15802	1.24319	1.18516	1.00793	0.632255	1.02268	1.01	0.493875	1.11978	1.11905	0.618342	1.25301	0.955815	1.03398	1.14872	1.01578	1.14265	0.988692	0.992565	0.409538	1.00616	1.22717	0.817722	0.91825	1.22534	0.804745	0.475287	1.13493	1.07054	1.18972	1.13448	0.801787	0.950867	1.05505	1.13166	1.1305	1.17106	1.08416	1.1408	1.17082	0.816595	0.291107	1.01568	1.15505	0.778188	0.692045
	2.25	1.09625	0.319498	1.09855	1.15693	1.10355	0.978866	0.577309	0.997286	0.871314	0.606174	1.05694	1.04676	0.575686	1.18685	0.718828	0.945401	1.07346	0.962209	1.08146	0.806469	0.987844	0.242421	0.991734	1.12984	0.731008	0.85046	1.1586	0.708156	0.393742	1.07809	0.986301	1.11527	1.05251	0.715265	0.887252	0.941181	1.07003	1.05462	1.10629	0.992759	1.0627	1.10962	0.815324	0.268788	0.894705	1.08292	0.696447	0.606054
	1.75	1.018	0.449649	1.03118	1.06938	1.03718	0.944664	0.517873	0.926058	0.766449	0.587807	0.988399	0.976305	0.483512	1.14271	0.557711	0.894135	0.968141	0.901583	1.01283	0.672408	1.02836	0.18332	0.86815	1.03999	0.648878	0.775802	1.0895	0.617162	0.30985	1.00973	0.882247	1.04421	1.01787	0.754076	0.731655	0.82716	1.0153	0.972026	1.01762	0.893804	0.966556	1.04005	0.828091	0.222879	0.770156	1.0119	0.610459	0.428373
	1.25	0.919369	0.51013	0.943433	0.97558	0.954221	0.842194	0.451832	0.826101	0.564287	0.487055	0.900935	0.899069	0.391983	1.05029	0.697323	0.844494	0.859476	0.828379	0.923088	0.520499	1.0222	0.185421	0.581962	0.935512	0.528537	0.690691	1.00913	0.527615	0.219766	0.965708	0.764626	0.95116	0.85565	0.69669	0.600266	0.704092	0.943475	0.86958	0.922847	0.782413	0.864705	0.957392	0.71893	0.144713	0.648291	0.928777	0.536233	0.324596
	0.75	0.778954	0.411159	0.838166	0.859142	0.858738	0.702459	0.373723	0.693228	0.39812	0.350668	0.798049	0.793332	0.275161	0.958747	0.744227	0.768421	0.741353	0.733591	0.812802	0.395686	0.978086	0.0501636	0.434205	0.832689	0.422007	0.552334	0.896119	0.383214	0.124312	0.868793	0.645219	0.831937	0.720816	0.609437	0.49171	0.601274	0.834046	0.752198	0.838884	0.660328	0.744723	0.842579	0.579838	0.0261696	0.516227	0.823892	0.618471	0.222654
	0.25	0.635165	0.153591	0.708145	0.726263	0.732045	0.529212	0.23218	0.55061	0.333854	0.174991	0.679191	0.667494	0.187732	0.855599	0.65414	0.67643	0.603123	0.652501	0.685505	0.266907	0.894272	-0.0412108	0.407042	0.736211	0.295121	0.422597	0.764744	0.300622	0.0362953	0.680995	0.53298	0.697811	0.661945	0.55864	0.373888	0.483075	0.717571	0.61975	0.736369	0.516055	0.648552	0.709005	0.453328	-0.128115	0.390345	0.703705	0.507388	0.0953981
	-0.25	0.487389	0.158684	0.564058	0.575648	0.571607	0.375794	0.0778531	0.409666	-0.00518677	0.018972	0.539439	0.530975	0.10977	0.713378	0.318734	0.536428	0.464102	0.533675	0.540385	0.0649935	0.771134	-0.0709205	0.570817	0.608325	0.190286	0.279892	0.624655	0.132145	-0.107536	0.357795	0.405835	0.577983	0.580334	0.463889	0.27168	0.350458	0.579137	0.478597	0.587695	0.383831	0.529526	0.569507	0.306614	-0.266063	0.257959	0.563711	0.198396	-0.0672183
	-0.75	0.325798	0.145582	0.405402	0.419158	0.373706	0.198753	-0.0593772	0.242469	-0.257472	-0.215132	0.377993	0.376926	-0.0622531	0.555115	-0.01037	0.392923	0.316541	0.348601	0.400505	-0.105121	0.605102	-0.202682	0.405237	0.455486	-0.0438993	0.111594	0.466292	-0.0440773	-0.268606	0.00497474	0.252088	0.43826	0.46001	0.34716	0.145316	0.220445	0.421262	0.311675	0.416949	0.25286	0.385235	0.401691	0.105327	-0.489777	0.108376	0.406954	-0.0442032	-0.198767
	-1.25	0.177091	-0.0126698	0.232218	0.243559	0.20505	0.0277977	-0.192362	0.0274652	-0.557788	-0.436135	0.217641	0.209859	-0.218317	0.371046	-0.2022	0.209025	0.17789	0.140326	0.244552	-0.32954	0.401898	-0.39225	0.293538	0.246218	-0.222092	-0.05245	0.312604	-0.153424	-0.404763	-0.20358	0.107808	0.267128	0.299551	0.175508	-0.0885209	0.10332	0.240348	0.160874	0.273632	0.120032	0.233689	0.211221	-0.0167523	-0.67275	-0.0464482	0.243141	-0.164326	-0.393535
	-1.75	0.0330211	-0.295333	0.0940625	0.0613598	0.0494744	-0.136214	-0.350327	-0.134092	-0.672945	-0.574274	0.0670705	0.0680237	-0.379483	0.203203	-0.423957	-0.0167506	0.0215659	-0.00593181	0.0645625	-0.532042	0.209284	-0.49327	0.156709	0.0736685	-0.363718	-0.25103	0.153998	-0.23243	-0.563312	-0.276333	-0.0277497	0.109978	0.15429	0.0153921	-0.236839	-0.0218662	0.0588169	0.0196437	0.0550222	0.00210015	0.0873172	0.05987	-0.068882	-0.856278	-0.185073	0.092267	-0.349019	-0.552052
	-2.25	-0.139139	-0.467845	-0.0722815	-0.0687181	-0.119788	-0.319089	-0.564529	-0.269812	-0.895301	-0.677164	-0.0775038	-0.0710193	-0.551953	0.0468091	-0.562421	-0.203717	-0.129525	-0.134971	-0.0790263	-0.643843	0.00693083	-0.660597	-0.00747536	-0.0808221	-0.582417	-0.377676	-0.0343027	-0.390969	-0.658053	-0.308826	-0.162908	-0.0768587	-0.0603956	-0.111574	-0.325741	-0.166449	-0.0474881	-0.139591	-0.0944018	-0.155485	-0.0451294	-0.0905093	-0.176284	-0.936392	-0.346584	-0.0453869	-0.540697	-0.674215
	-2.75	-0.247483	-0.601582	-0.226197	-0.207111	-0.254084	-0.462716	-0.684395	-0.4335	-0.921598	-0.724279	-0.20463	-0.237257	-0.748564	-0.118715	-0.700055	-0.381681	-0.2685	-0.275026	-0.236485	-0.732189	-0.211751	-0.836388	-0.179165	-0.230428	-0.658223	-0.570004	-0.184849	-0.599188	-0.771296	-0.492379	-0.301329	-0.234409	-0.268674	-0.246543	-0.443915	-0.305838	-0.222638	-0.268952	-0.183111	-0.303835	-0.179049	-0.249834	-0.324326	-1.05209	-0.4634	-0.209928	-0.681089	-0.814509
	-3.25	-0.396425	-0.59367	-0.37425	-0.365036	-0.404927	-0.585741	-0.761646	-0.600574	-0.951145	-0.800995	-0.375985	-0.385376	-0.783369	-0.320798	-0.767434	-0.53905	-0.431594	-0.468118	-0.374932	-0.819826	-0.402733	-1.07128	-0.35569	-0.373926	-0.854329	-0.760446	-0.324531	-0.714355	-0.894855	-0.612243	-0.464723	-0.376573	-0.457294	-0.407224	-0.603882	-0.460606	-0.338698	-0.417874	-0.353244	-0.469882	-0.367237	-0.404682	-0.46897	-1.35415	-0.637888	-0.364128	-0.820083	-0.91043
	-3.75	-0.611461	-0.708512	-0.522511	-0.538064	-0.590731	-0.828537	-0.994099	-0.82058	-0.990912	-1.04092	-0.496305	-0.572122	-0.966969	-0.511239	-0.804586	-0.670005	-0.563896	-0.633904	-0.544913	-1.03755	-0.559534	-1.15742	-0.528848	-0.587306	-0.968529	-0.904567	-0.484346	-0.79631	-1.13563	-0.734589	-0.615447	-0.539675	-0.711766	-0.60195	-0.758084	-0.636133	-0.499504	-0.613808	-0.527997	-0.634138	-0.555909	-0.560405	-0.592449	-1.38688	-0.662905	-0.506668	-1.00112	-1.16273
	-4.25	-0.755313	-0.889239	-0.640139	-0.671412	-0.646571	-1.06005	-1.24686	-0.905856	-1.25913	-1.03563	-0.718858	-0.719653	-1.04143	-0.679366	-1.15743	-0.870921	-0.757615	-0.761525	-0.708778	-1.25324	-0.664506	-1.14777	-0.758131	-0.716104	-1.16263	-1.07342	-0.654737	-1.07638	-1.22242	-1.05117	-0.748036	-0.696485	-0.926358	-0.763814	-0.862179	-0.828924	-0.667839	-0.801609	-0.660841	-0.824531	-0.672093	-0.73708	-0.778359	-1.39244	-0.772932	-0.44737	-1.0617	-1.33811
	-4.75	-1.0488	-0.914857	-0.886806	-0.834191	-0.936976	-1.27536	-1.46342	-1.03509	-1.21449	-1.16533	-0.946443	-0.949365	-1.06449	-0.885671	-1.34918	-0.97188	-1.00153	-0.988648	-0.893027	-1.27732	-0.885496	-1.49023	-0.976228	-0.890986	-1.29813	-1.20463	-0.827785	-1.21085	-1.17905	-1.2798	-0.939541	-0.898635	-0.997244	-0.915794	-1.03763	-0.973713	-0.876447	-1.07217	-0.848065	-0.961749	-0.800877	-0.889614	-0.955495	-1.2821	-1.0198	-0.375136	-1.19127	-1.16837
	-5.25	-1.15117	-1.12737	-1.246	-0.974434	-1.1161	-1.37376	-1.32512	-1.32541	-1.27756	-1.37957	-1.14666	-1.14461	-1.59726	-1.11569	-1.40527	-1.06881	-1.02888	-1.03072	-1.12635	-1.30332	-1.04969	-1.53737	-1.08768	-1.01278	-1.39124	-1.17014	-1.06476	-1.27692	-1.4286	-1.3953	-1.12997	-1.1136	-1.17541	-1.20324	-1.19614	-1.07923	-1.16057	-1.03845	-1.03405	-1.01779	-1.07662	-1.13837	-1.08851	-1.5697	-1.01676	-0.532586	-1.25706	-1.44142
	-5.75	-1.23051	-1.21018	-1.16395	-1.24517	-1.23723	-1.46304	-1.3638	-1.41852	-1.26235	-1.22204	-1.17159	-1.28752	-1.35136	-1.08894	-1.41619	-1.38273	-1.19633	-1.40232	-1.15941	-1.49574	-1.39879	-1.39832	-1.21504	-1.24539	-1.33656	-1.29071	-1.53327	-1.21162	-1.58875	-1.46786	-1.37267	-1.41513	-1.46303	-1.17609	-1.20573	-1.15244	-1.10437	-1.33071	-1.18164	-1.12216	-1.26666	-1.11261	-1.24185	-2.6382	-1.20169	-0.699449	-1.31815	-1.42942
	-6.25	-1.27059	-1.40248	-1.45647	-1.34927	-1.5124	-1.38596	-1.17933	-1.64004	-1.49692	-1.57984	-1.32997	-1.61969	-1.63846	-1.40091	-1.35133	-1.39504	-1.30969	-1.16581	-1.31532	-1.39934	-1.07467	-1.31554	-1.35951	-1.44876	-1.93815	-1.48621	-1.44525	-1.4191	-1.39518	-1.29083	-1.56479	-1.29936	-1.52209	-1.32444	-1.35821	-1.24851	-1.4226	-1.24916	-1.20563	-1.24713	-1.44282	-1.39222	-1.5979	-1.56386	-1.31938	-0.861829	-1.69969	-1.31915
	-6.75	-1.35133	-1.63757	-1.3841	-1.3659	-1.38986	-1.38902	-1.39802	-1.39648	-1.64105	-1.51514	-1.31807	-1.52312	-1.514	-1.38222	-1.46477	-1.32103	-1.50668	-1.53035	-1.43022	-1.41851	-1.56176	-1.51161	-1.56006	-1.56067	-1.40557	-1.71547	-1.53297	-1.35778	-1.64527	-1.43794	-1.51067	-1.20671	-1.57208	-1.23955	-1.25841	-1.38305	-1.80209	-1.39959	-1.32017	-1.65351	-1.39529	-1.28898	-1.35532	-1.83154	-1.23917	-0.951408	-2.00187	-1.71895
[truncated: 23 more columns]

## Sheet: Colourindexvs.Angle
		Colour Index (MWS/UVS)
	OBSERVATION	1	2	3	4	5	6	7	8	9	10	11	12	13	14	15	16	17	18	19	20	21	22	23	24	25	26	27	28	29	30	31	32	33	34	35	36	37	38	39	40	41	42	43	44	45	46	47	48
	Solar Angle
	6.75	5.64435	5.11122	4.25534	4.40575	4.68793	4.96952	4.82843	4.29835	5.21882	4.22681	3.74262	4.9611	4.65766	5.44283	4.30467	4.90823	4.57284	3.5523	3.88477	5.17738	5.25332	3.77442	6.80019	4.52826	4.7897	5.33185	3.98191	4.71061	4.45987	4.98069	4.33796	4.79465	4.68827	4.43551	4.66635	4.86232	4.0261	4.46115	4.2528	5.4354	5.13912	4.34792	4.17577	4.22045	5.37025	4.26077	3.8397	4.66369
	6.25	5.28072	4.12508	4.25636	4.76467	4.72536	5.11396	4.83975	4.63319	4.72937	4.21675	3.84203	4.81737	4.67966	5.42913	4.35362	5.04925	4.62054	3.60177	3.92232	5.3985	5.24372	3.60401	6.705	4.5941	4.94199	5.25332	4.03284	4.5351	4.42091	4.89249	4.34385	4.76661	4.81372	4.76906	4.67649	4.83512	4.04772	4.55061	4.33578	5.32565	5.14655	4.41867	4.41544	4.33499	5.4154	4.23092	3.63684	4.75414
	5.75	5.03119	4.06874	4.26791	4.90338	4.78256	5.46955	4.60146	4.62801	4.63588	4.27675	3.92179	4.6646	4.47379	5.40398	4.73153	5.2392	4.69181	3.5775	4.03019	5.49015	5.27539	3.6078	5.34727	4.48954	5.12154	5.32993	4.11206	4.49488	4.37684	5.07933	4.33134	4.86573	4.94385	5.24805	5.13831	4.55835	4.25269	4.63539	4.24249	5.50495	5.14924	4.47805	4.57614	4.5365	5.45295	4.2466	3.91343	4.56967
	5.25	4.72036	4.48831	4.29665	4.9944	4.84171	6.13245	4.37246	4.54022	4.65557	4.4242	4.01594	4.51605	4.35216	5.3928	4.9247	5.19894	4.74201	3.61373	4.27303	5.33417	5.1108	3.59496	4.06233	4.20331	5.34911	5.31403	4.18107	4.748	4.3582	5.20739	4.29759	5.09368	5.11394	5.29683	5.9598	4.66128	4.60038	4.69109	4.69897	5.6528	5.37221	4.50414	4.65186	4.35482	5.45251	4.29046	4.07055	4.56619
	4.75	4.66155	4.77706	4.34722	5.04704	4.87919	6.35086	4.42768	4.55921	4.7847	4.66532	4.08548	4.43187	4.39103	5.41378	4.78605	5.21974	4.73658	3.71397	4.40109	5.06268	4.85732	3.6666	4.20262	4.32881	5.71232	5.29282	4.29531	4.74984	4.30052	5.25068	4.287	5.02897	5.26574	5.2881	6.07888	5.13096	4.79525	4.70367	4.84891	5.53277	5.26052	4.52892	4.70367	4.07274	5.4797	4.38799	3.91011	4.53187
	4.25	4.88734	4.90215	4.40575	5.18773	4.89467	6.17855	4.46339	4.57471	4.40066	4.94536	4.17577	4.47939	4.46678	5.54874	4.6394	5.32731	4.76507	3.57419	4.51961	4.99236	4.95817	3.70262	4.90625	4.47305	5.82875	5.15079	4.37977	4.50568	4.28224	5.51295	4.26126	4.93166	5.31922	5.99918	5.4095	5.32423	4.35667	4.70161	4.85887	5.2763	5.17298	4.54865	4.62173	4.10509	5.48531	4.46356	3.97552	4.58762
	3.75	5.09116	5.43016	4.46402	5.25669	4.91234	5.74081	4.48664	4.64724	4.37822	5.10378	4.25136	4.36237	4.54291	5.97953	4.83864	5.41515	4.81008	3.49811	4.52941	4.98524	5.10375	3.68172	5.43224	4.79526	5.73504	5.12585	4.46192	4.53345	4.29495	5.86333	4.17405	4.80979	5.30598	5.6475	4.8295	5.24811	4.11107	4.65301	4.83912	5.25653	5.15981	4.60278	4.48827	4.18655	5.33152	4.54089	3.90247	4.33593
	3.25	5.20375	6.25738	4.54433	5.34099	4.9188	5.19877	4.4755	4.78018	4.25954	5.14222	4.32882	4.31929	4.61315	6.38331	5.18281	5.17654	4.72866	3.91401	4.66177	5.07965	5.30421	3.65109	5.31133	4.95729	5.82406	5.26597	4.49884	4.65197	4.24447	5.89904	4.08332	4.62377	5.39944	4.93582	4.53922	5.25346	4.18985	4.60053	4.80201	5.2062	4.94225	4.6918	4.6101	4.25809	5.16725	4.61351	3.91344	4.19746
	2.75	5.03103	6.10706	4.61962	5.33013	4.80242	4.76537	4.50095	4.91877	4.59668	5.11355	4.38923	4.39374	4.75041	6.10138	4.92697	4.85443	4.68856	4.07318	4.78798	5.03624	5.72211	3.60613	4.5792	4.76743	5.48557	5.25148	4.56845	4.54403	4.25536	6.05043	3.9632	4.53821	5.4151	3.95331	4.34617	5.08807	4.27589	4.49062	4.82101	5.02418	4.9514	4.78239	4.58833	4.41591	5.00967	4.6691	4.06172	4.10384
	2.25	4.75743	5.22752	4.69825	5.23442	4.69694	4.72467	4.62299	4.90555	4.4118	5.05467	4.46144	4.41854	4.79479	6.15573	4.77453	4.80792	4.62478	4.15039	4.84601	4.41226	6.16808	3.54006	4.11991	4.47664	5.33922	5.1354	4.6556	4.58076	4.21234	6.30542	3.81617	4.51012	5.1964	3.77833	4.26912	4.81553	4.41704	4.38853	4.84247	4.67337	4.87954	4.86527	4.76763	4.60902	4.67679	4.74094	4.35746	4.03903
	1.75	4.70436	4.77529	4.73959	5.12635	4.79913	4.70571	4.6967	4.65565	4.51234	5.12756	4.51187	4.46247	4.53496	6.24684	4.58714	4.85922	4.46095	4.17795	4.88304	4.11924	7.46329	3.30858	4.33667	4.39638	5.19416	5.07179	4.70479	4.68195	4.19728	6.3944	3.66868	4.58553	5.36656	3.7685	4.01494	4.44585	4.59492	4.2902	4.81344	4.30692	4.89061	4.90698	4.7204	4.78004	4.36852	4.74653	4.13129	3.90347
	1.25	4.52638	4.60834	4.75848	4.9875	4.82372	4.5464	4.78875	4.38778	4.5039	5.07531	4.54891	4.48754	4.46495	6.11015	4.70467	4.65846	4.251	4.29711	4.90053	3.78122	8.21161	3.42247	4.63002	4.33061	4.94365	5.00007	4.71717	4.49349	4.21756	6.3736	3.51079	4.64004	5.12985	3.69932	3.68583	4.24358	4.64462	4.17087	4.75067	4.07698	4.86666	4.89666	4.50865	4.64516	4.1275	4.75033	4.05663	3.86448
	0.75	4.21538	4.64053	4.73145	4.79815	4.76786	4.38282	4.78633	4.10047	4.45575	4.92028	4.57899	4.5032	4.51843	6.08241	4.92294	4.6034	4.0628	4.37052	4.90676	3.76068	8.15606	3.4293	4.79669	4.27444	4.77643	4.81457	4.68807	4.52066	4.14628	6.22344	3.42169	4.63372	4.80481	3.67459	3.50971	4.11046	4.63377	4.06587	4.73591	3.98099	4.74107	4.84129	4.47371	4.24965	3.95991	4.7458	4.23549	3.75774
	0.25	4.038	4.50811	4.64817	4.62755	4.74683	4.06608	4.65395	4.03465	4.56596	4.65792	4.57884	4.44498	4.50658	5.974	4.96912	4.72505	3.96177	4.50687	4.84432	3.74655	7.56335	3.61585	5.61977	4.25797	4.82265	4.73542	4.66183	4.50582	4.27536	5.69462	3.50751	4.66396	4.78705	3.70696	3.49883	3.96169	4.55588	4.01542	4.78878	3.96277	4.80213	4.76717	4.53153	4.25917	3.91891	4.73572	4.17411	3.75806
	-0.25	4.03511	4.56428	4.51954	4.41788	4.55893	3.93383	4.55322	4.07697	4.42872	4.51391	4.51431	4.46174	4.44782	5.75879	4.62981	4.72308	3.97371	4.68518	4.8061	3.65008	6.84492	3.82171	5.92678	4.31054	4.52843	4.47393	4.64505	4.4964	4.07465	4.8291	3.57966	4.61459	4.96499	3.75108	3.61716	3.96009	4.45319	3.92511	4.79004	3.88287	4.88881	4.6706	4.40896	4.03278	3.95385	4.73979	4.02283	3.59433
	-0.75	4.10841	4.24278	4.38599	4.26029	4.4412	3.81074	4.47749	4.165	4.29181	4.10665	4.46943	4.35715	4.16804	5.62732	4.31521	4.95835	4.04892	4.49459	4.74168	3.68829	6.12242	3.83147	4.8258	4.22493	4.0983	4.52441	4.55203	4.49628	4.09513	4.1443	3.67649	4.38865	4.96223	3.8144	3.79631	4.07843	4.42851	3.91513	4.6069	3.83201	4.95838	4.51305	4.32736	3.69082	4.00765	4.63789	4.00851	3.57548
	-1.25	4.02036	3.80144	4.28565	4.109	4.17731	3.69387	4.22682	4.09828	4.14828	3.49457	4.263	4.38118	3.96228	5.24056	3.99615	4.88297	4.03518	4.18772	4.54456	3.76338	5.38631	3.5832	4.79535	4.09401	3.67924	4.26321	4.54053	4.28648	4.08522	3.81025	3.69941	4.24109	4.64474	3.65425	3.70367	4.01083	4.25231	3.83006	4.47712	3.8513	4.89249	4.35159	4.19918	3.22104	3.84788	4.57865	3.97261	3.55597
	-1.75	3.99159	3.50781	4.04264	4.0445	3.9315	3.64002	3.95313	4.16889	3.83115	3.4955	4.15499	4.07698	4.0762	4.93517	3.75409	4.70188	4.08236	4.05086	4.32108	3.41215	5.07975	3.29821	4.51152	3.78758	3.64565	4.38905	4.33316	3.95379	4.50782	3.6651	3.54374	4.06001	4.53635	3.60529	3.76168	3.82028	4.1734	3.72036	4.01497	3.84603	4.92439	4.05243	4.04699	2.9164	3.84318	4.48589	3.92777	3.30337
	-2.25	3.93855	3.41371	4.02186	3.97874	4.03014	3.5202	3.68005	3.75274	4.08821	3.71481	4.08921	4.04892	3.97349	4.6988	3.76036	4.03235	3.82731	4.01827	4.38517	2.93518	4.46033	3.0732	4.25543	3.75983	3.69739	3.69884	4.34453	4.08275	3.4386	3.56825	3.44639	3.91001	4.11669	3.58163	3.61032	3.80265	3.87117	3.66776	3.93886	3.78878	4.87058	4.15656	3.94837	2.89411	3.60003	4.27411	3.74593	3.08164
	-2.75	3.58013	3.44315	3.64567	3.61288	3.7346	3.11825	4.15635	3.30027	3.26019	3.04061	3.61175	3.85964	4.41513	4.13052	3.72272	4.24828	3.50921	3.56129	4.36683	2.834	4.4651	3.16511	3.88091	3.57702	3.11702	3.83488	4.10556	3.62828	3.33646	3.52565	3.45376	3.59284	3.74884	3.56123	3.68436	3.46775	4.03275	3.51638	3.70807	3.60052	4.71747	3.7187	3.83046	2.49118	3.2111	4.31769	3.17406	3.02333
	-3.25	3.72785	3.32081	3.69154	3.6128	3.40372	2.80821	2.94811	3.17132	2.78213	2.57163	3.67486	3.61044	3.1784	4.01563	2.8812	3.72816	3.53845	3.84016	4.00109	2.46291	4.02978	3.35293	3.61256	3.46124	3.67543	4.19678	3.70082	3.24281	2.91571	3.38203	3.01764	3.24522	3.62886	3.38636	3.69112	3.44859	3.66182	3.37778	3.72648	3.38153	4.23176	3.75822	3.47071	2.84328	3.64016	4.10581	2.62182	3.33996
	-3.75	3.31513	2.76984	3.4868	3.49602	3.59699	2.68733	3.12235	3.47304	2.44245	2.62006	3.1417	3.76513	2.72003	3.71218	3.29211	3.70575	3.07213	3.2567	3.56281	2.78594	4.06574	2.76325	3.40608	3.49242	2.43872	3.72362	3.51554	2.65812	3.3825	2.68612	2.93449	3.22238	4.01162	3.18219	3.28451	3.46545	3.32969	3.17262	3.47678	3.2884	4.21083	3.42982	2.99838	3.01156	2.80034	3.61746	3.61416	2.67533
	-4.25	2.95017	2.83709	2.90175	2.78918	2.74782	2.21847	2.58629	2.21448	2.37733	2.17727	3.04239	2.84208	2.81887	3.20652	2.96096	3.48831	3.21377	3.39862	2.829	2.43807	3.44195	2.18887	3.4407	2.8501	2.91582	2.50781	2.98518	3.68907	2.30552	2.57958	2.52168	2.39343	3.08693	3.28619	2.82601	3.00517	3.14652	3.13232	2.93064	2.72909	3.5456	3.26246	3.42336	2.73129	2.54168	3.63876	2.55065	2.18557
	-4.75	3.08092	2.28694	3.20431	2.92546	3.11144	2.30155	2.28136	2.2329	1.9423	2.06743	2.61755	3.10823	2.3561	3.27499	3.07757	2.92688	3.58558	3.39656	3.21663	2.10257	2.70214	1.91301	2.98093	2.60313	3.22694	2.84753	2.96897	2.92335	1.96371	2.10977	2.23236	2.40892	2.68974	2.02004	2.10998	3.12799	2.66535	2.95478	2.96972	3.05012	2.70027	2.76922	2.93938	1.9095	2.86421	3.6825	2.30796	1.64273
	-5.25	2.88653	2.06634	4.96703	2.5783	3.351	1.87318	2.15666	1.98914	1.84777	1.51444	2.59872	3.09311	1.49633	3.06453	2.35064	2.61179	2.5283	1.98923	2.93437	1.84952	3.28129	1.17115	2.68288	1.98712	2.09759	1.82203	3.07051	2.05572	1.63637	1.52939	2.38642	2.23247	2.13114	2.57003	2.11173	2.1589	2.57576	2.61711	2.81458	2.10185	3.15768	2.93576	2.67825	1.48338	2.21488	3.6778	2.20305	1.60851
	-5.75	2.19215	2.35454	2.27646	2.43603	2.42636	2.31603	1.80594	2.31757	1.38424	1.63899	1.85944	2.28097	1.72402	2.85475	1.69655	2.07221	2.08003	2.85675	2.25608	1.36458	2.69986	2.01692	1.97435	1.61386	2.92555	1.86788	2.23644	1.85301	1.37288	1.275	2.49663	2.27315	1.89339	1.49281	2.40516	2.36899	2.52737	3.64059	2.20752	1.99523	2.17992	2.10652	2.05785	1.43383	1.82553	3.1207	1.64116	1.97389
	-6.25	1.57177	1.79646	2.49419	1.82742	2.25046	2.87983	1.78932	1.43383	1.82178	1.43383	1.97461	1.77521	1.43383	2.5393	2.10246	1.12701	1.83447	2.58493	1.97942	2.31572	2.08474	1.56498	2.10225	1.89213	1.43383	1.98546	1.31645	1.55357	1.26064	1.54474	1.74834	1.96331	1.55002	1.31405	2.32385	1.95249	1.90084	2.41116	2.42662	2.49893	2.52483	2.76815	1.83977	1.43383	2.53011	2.88707	1.43383	1.82687
	-6.75	2.01516	1.37148	1.82989	1.90225	1.97508	1.62218	1.33204	1.73831	1.43383	1.43383	1.83975	1.68908	1.36344	1.82445	1.82303	1.47832	1.5875	1.66177	1.6129	1.2563	1.52869	0.937349	1.43383	1.87221	0.767836	1.43383	1.50068	1.55551	1.43383	1.34623	1.21075	1.87198	1.43383	1.49752	1.50819	1.38279	1.43383	1.3877	1.78837	1.50643	1.76682	1.85464	2.89722	1.43383	1.75312	2.34531	1.43383	1.43383
[truncated: 23 more columns]

## Sheet: MWSopsinFluxvsAngle
		MWS Cone corrected photon flux (photons/cm2/s)
	OBSERVATION	1	2	3	4	5	6	7	8	9	10	11	12	13	14	15	16	17	18	19	20	21	22	23	24	25	26	27	28	29	30	31	32	33	34	35	36	37	38	39	40	41	42	43	44	45	46	47	48
	Solar Angle
	6.75	4356602402738660	654297903108494	3236154397820180	3124395329131840	3549367522408980	2123024788580210	1100419082270220	1755292694316610	1708292231852650	838479818032730	2666384935740930	3172833633508620	911593155614402	4420203981130770	1447544756145080	2702777867044280	3094089554280190	1528553440060050	2599157359766130	2885140970128670	2244611992468650	690347042081492	1254985959613330	3758673755349950	1302529218240500	2061663528694490	3408972896483870	1619225781266640	599358568213391	880496681168431	3021493479902500	2411094886336950	1784241333108020	3483317120439870	1221650200603340	3065992926658340	2749375591657410	3423227910429470	3129057652954360	3077428273922640	3281164714818990	3215434359595470	1094940726150730	475530556820598	2720992091197890	3032370273139070	1027749494061420	1309420725826540
	6.25	3617574388286110	470878321821545	2966685659944530	3176397317831660	3290981653624700	1800633073852770	993720204870231	1888530549667590	1558574860436940	730016032014067	2521850054053550	2863013438988800	788158753564645	4040986489516180	1604003112727660	2441115986905280	2888412274469800	1560864322381450	2409240092226460	2807707253052370	1994430803809080	634896644881381	1854063244511920	3566011990439950	1205633794853830	1916065547986640	3203645725919220	1468259495885910	585807036699376	873249487639743	2793948445916840	2288535199622090	1941804549237220	3552800193333090	1188275104429460	2747310315667160	2596355036310980	3190108918030780	2907360090903000	2688459164659120	3043134070995020	2994421708886530	1167259701683400	462937679075542	2554607204510630	2781835327827320	1152027171582750	1075209102162280
	5.75	3019728888734380	404396453139382	2736374390939590	3020237654673740	3048293905285730	1716626407523970	875654758709531	1730310325069030	1458454111282080	668608274412941	2369413472143010	2563977612236810	690737258067364	3674439135131560	1565649877157830	2181268697137030	2681922188892520	1531187059137540	2270584183140350	2621696084585780	1844279748607340	674531370484352	1684430615187530	3186320499446010	1160192280164780	1802248235712490	3004490546456460	1286011818261420	476399395125499	938903294023138	2513929760438040	2400446282672810	2078281669049660	3221940603286660	1385347243621340	2319481598467730	2472707994468990	2972989069047760	2566853203864180	2605560536012800	2780397726529150	2756786492534340	1268203440316440	447627527510864	2361368842039970	2564464830365210	788591003405324	900693905773474
	5.25	2475034651887260	556492882257553	2489495288043970	2801386812832590	2799256542980170	1726803471089580	787886281644190	1535207612327290	1371535601948460	650890687454644	2214163169380280	2316948185091210	624403972478396	3308139415774990	1210421974105180	1883161429495860	2469463632940470	1468659944138650	2205816380525070	2258509285664930	1603034871329860	663356264003090	1400707077700410	2616303876211780	1181794333365330	1579390463355160	2797430662318440	1174587052974360	466269584637772	784098860856169	2264053664034680	2473362901725830	1821340716380540	2221842263974680	1564933701701580	2106219984390290	2379334510013490	2694377922765800	2575961524320680	2544098547084840	2584537621334740	2514501239130700	1216729423791770	390160967994540	2157939562839390	2367447576843120	899811012719699	893735371639756
	4.75	2182639693956990	431306226829754	2268226238054520	2568519279914500	2541295987198530	1425693596780270	778201436373735	1401465037454830	1568045098361280	521187752644661	2038272587402430	2086227962521820	566824767948744	2979681699018950	1042515768391700	1669095713662510	2227746935613690	1399423291594000	2068716417692430	1873469333133940	1292365104169640	545633518167327	1551609947086910	2392565802463920	1213518276252790	1356444353575140	2552225501660100	1170068491316820	422363443426830	676300292589467	2067783824999180	2178779460262850	1693001356867240	1541484063133710	1361999040893650	2098321501119440	2320302614291110	2405621235370750	2397517939128390	2339690818703530	2265407194546670	2281192014425860	935064822147784	350040930436725	1921788969101160	2179880728647730	1167944949492100	812382586345449
	4.25	2081996699851580	245994857225388	2058230154558280	2366785647709350	2275376948434680	1118442522081390	728999681523974	1250642229405290	1503948000488130	414605493289664	1860885098379760	1922531989586400	506028963631621	2618997180773940	743987503321113	1519832462090080	2015240633199030	1228082261625840	1915058947321200	1634572472251480	1097343473889530	420314289320405	1726137659258300	2162836905052760	1123316147284940	1159426711581910	2332964381783420	1041817744768140	412746668992770	716892144792183	1836220905785130	2091676981317600	1706441072744290	1151714601225420	1249556144601820	1919403850980110	1893393788550730	2126089217410590	2148061789383990	2001131074885260	2042428402291480	2095614840910510	697502488685916	329247935932202	1680119427827380	2010061255376680	1386764132700750	813551623733118
	3.75	1997017077213440	193820989866216	1856027591831500	2137685174628840	2030508819858820	1051253971548610	597577461720904	1097845630312690	1433573906454760	301923126893222	1691876778425500	1671768970593900	479048243297819	2347025858380080	721591071575522	1399085104551850	1812305085907670	1086375685305330	1700589590840760	1409213331463980	983151259503738	350770513685199	1340052760811240	2061009193746440	945056524620831	1051838089470380	2112226171858530	884071055504933	362495895356393	992888990341482	1579818632375100	2032340865250360	1409764494709510	912194077097812	1113302106886780	1562449480119020	1627895014637060	1859223547583240	1891641289020220	1702036096030190	1843658011053490	1881982710884400	754889592887998	271102898821290	1416868617822670	1814872390682040	1066836973761950	666315302061911
	3.25	1835401750187450	291525992763737	1653227061306250	1912104800093370	1779998146867380	1052911011718980	481364791374066	998870886662071	1133143342676430	290945989498217	1512273205473200	1460732846443660	466439937339871	2068801556322810	926448117183094	1232296671661430	1571443894528930	1086191880809350	1549240927442820	1190595677102100	891082222341883	332784126290165	963553425993970	1937071125156910	793393815790441	912832831807959	1879213697100390	767815197385352	324670551696214	1334395468967590	1331379072936680	1785048311733170	1439538357149890	691831983912158	988680013060009	1305768657784530	1517460299188790	1601682455427020	1651274159328430	1425725499890560	1553493424673840	1655621130275460	624450251573124	209102013976212	1182519253049770	1616460712137260	794135257983509	594812339728811
	2.75	1531422666933170	276381624874405	1432768477177650	1664173306975830	1505226351064990	957634413070807	422057738598699	988480714566137	994594303021826	293225652815548	1334894637030960	1310111339738240	390899015209811	1712434076398250	870296324623700	1010994948041350	1355345532524260	982470831098191	1369948430003250	912419312598497	894037475134207	245698402331784	991815795759341	1626855477234350	600689751895719	782704982667604	1653700987104960	614917499150674	289325807654796	1270708225529150	1115483730121490	1516363869252140	1270970758958470	596513127144290	847854406181788	1054406468396370	1362030724156190	1317454799044050	1442070383321160	1158790693267320	1334302286757730	1454221217510530	630695043584494	184514904536845	971817991716513	1422455819111840	586613175161249	486513713962987
	2.25	1188377304814160	183568656300511	1245827420946080	1359517091648580	1253078410676770	900284802393230	371456124583765	933008185181904	736833003819717	378250168251049	1155367942435670	1107480749685920	352203582318622	1469987531997910	509108398123065	817689678031037	1140489800011440	869886857473265	1186913626712170	612376399435310	869863076235490	167868327331306	963355921759466	1321700142123730	490009389792621	673666800265558	1406618296101190	491189890091588	240528147512156	1108522536057350	921840688161270	1283158859521020	1052397956309740	492661042649206	731370025206272	820971879960384	1172534394899910	1101113128350790	1247473904070780	942949046332406	1117001494618610	1258770753688830	625828407890276	174084267289399	738650250792672	1202663670931050	485399497896953	398781341746661
	1.75	989111505324958	247882603453195	1061941372634420	1107472030625310	1053623903331260	837141942722475	322234181268627	795594344706861	577448091485958	361995431043598	985157786628222	940918074918476	291317417464351	1311763471021310	354249031722318	728055690634868	898179043484842	748790487334065	1010694399744390	456542665337399	901692859942670	147530814693788	731764884451875	1081481051136030	404415633838885	570120153773931	1188630135015880	398533912124725	198772921226195	942785813585358	730538911519474	1089888373424030	948657028899090	542656178943270	515099346315070	640660305047778	1019166508826840	907687981209714	1027927283399920	760911561891628	900203226911958	1068595124316770	647220078388084	155696174876066	558738167365222	1017386169106820	404295963968908	267464855091612
	1.25	799587740139457	288761362727477	861364929475394	888468295052430	868972268007720	668765547888509	273999400458643	635820650178350	365160193344885	285094104759835	800352857722651	783702674385415	240801445663047	1057246314214170	487816846956113	654976808416375	704962387614215	625030965100700	815149613921510	331630425895428	861663986265190	151361775666518	374166918788595	858559525309074	310026744961929	466507169565298	981301577084617	326673285259307	161560174601175	843041744310133	563386754059184	880646811296812	652073831841371	478628192951218	388698264149525	481401633304304	863953669019218	715387975345259	831162753577601	595560211012366	710607486977795	884130948678141	513344365034071	130709452384108	425977119523824	838622799211190	341505022052731	209562629723191
	0.75	588332265681949	234307767064318	672897149972958	675776415773279	698508389786703	487393950148831	225512192954641	471544295509651	250559267350850	208453864912774	626367616374266	611632355979873	183876461266099	846192453618628	539665519264271	540137151077521	544738113703989	506957162268898	630946268614499	250918222344791	761683062288526	111457384734109	256789325466979	680165142215029	240167150192580	336788293536631	758504157109287	234595231606875	129312931440161	662375736910286	434481813530182	666514580096095	495318569512140	398606962059847	308696768325214	376508525402135	678850079287101	549499083319690	676351605686470	450985830711953	535095336007113	685670071809820	373635141679512	100200157831253	319524683632797	655741224467486	406040881840917	165644254273342
	0.25	428122054556292	132214533132787	500039087972526	496600133624613	524070753085894	331681678383847	162102191364681	341050422481213	214029823188314	139362655863951	471353880871787	456077305449645	149160693545994	649495804468810	431566394270837	427251321011586	403285145143616	413256810998841	468574347296832	186027251044107	599240453982124	9.01151e+13	206353381499924	537634358144561	172952953123521	247462682757826	564602240871068	192795437781980	105088357719089	422160931381593	339132355499846	485988278108490	432446095794193	361860244902247	235973507035042	287093047827477	516475402518518	408871483131671	526224718781577	325445153801424	421828027794747	508905401424217	278494078944989	71248223320477	242710480067488	493628688337254	318356315025123	123304231209802
	-0.25	302615728120370	139940545065448	357731359076162	351382474633080	362190636594111	236287816258624	110533561598753	242993721723431	9.55942e+13	9.86684e+13	337675279211809	328456724638699	123560492996875	452171143809136	195929421054335	307506567295904	295086633245524	307246683807797	333798250819382	115961907121020	424975501757301	8.24558e+13	286760527210678	387233586430309	128508267115882	174195268966979	408615100214704	129041167421256	7.40507e+13	197329725273841	254580823419492	365774757132519	335867851196241	292232842359365	185964577924389	211009490216900	371990009434878	297805960024358	369259524756558	242894095235646	312707737386731	367406434963523	198308837385689	51539036906259	179997883392804	355368729274854	153114510463111	8.39625e+13
	-0.75	204885768220727	136762559612598	246509286108167	243784641493611	231009419022960	158160473542619	7.94286e+13	162838027413930	5.2716e+13	5.89566e+13	230108870011299	226070041077862	8.17374e+13	299204517210081	9.13705e+13	206010244913780	208152441065268	203939705670716	238374509751456	7.79179e+13	273774501314310	5.99806e+13	228519814863325	264451579819477	7.78096e+13	113914958495977	280328124942081	8.4062e+13	5.01781e+13	9.21263e+13	178715838325964	260961435837409	232091309262950	221721409490930	135125441168083	149519863467105	257285115753182	204882402064869	248329723336481	179391394871220	220012960745908	249810624826339	125615254233553	30975840811136	128167713639592	244729855585212	8.57763e+13	6.25558e+13
	-1.25	143496513884855	9.5058e+13	166668437444006	161430499316327	156607243511588	105436481518037	5.64577e+13	9.94413e+13	2.54151e+13	3.42621e+13	156681301706620	151542284803873	5.57315e+13	185269764188222	5.90585e+13	127577694267150	146857902981999	130726378205679	163074569192669	4.58419e+13	169263620549846	3.81494e+13	182399682197483	166000002481700	5.26768e+13	7.43261e+13	193892512436892	6.37833e+13	3.5861e+13	6.08572e+13	127372677895804	174683480166029	153593801350058	147762782745437	7.71985e+13	105704904255388	169266426243440	144551760295895	172949815024870	131354766059015	154156048132909	161097825340617	9.4043e+13	1.99971e+13	8.92855e+13	166196613428353	6.40096e+13	3.95955e+13
	-1.75	102203414301781	4.88798e+13	119506059977604	106205760613463	108829506262153	7.18435e+13	3.87548e+13	6.90522e+13	18968958664801	2.49215e+13	109253929016554	106955416625657	3.83926e+13	122398654633723	3.59872e+13	7.6683e+13	101398889723328	9.20773e+13	105444389594079	2.82088e+13	109834947308815	2.93776e+13	132998104493240	111190774275386	3.64592e+13	4.64501e+13	132856577978323	51373900351266	2.46725e+13	5.09701e+13	9.13439e+13	121008078322243	106844771641480	102028088691139	5.62995e+13	7.47796e+13	111602544873644	104040382400401	109034915074853	9.9055e+13	110494353789927	112596038786339	8.29547e+13	1.27622e+13	6.43819e+13	115811529499686	4.14164e+13	2.61478e+13
	-2.25	6.93857e+13	3.29667e+13	8.04218e+13	7.7966e+13	75276350956700	4.67081e+13	2.42803e+13	5.05324e+13	1.11594e+13	2.01421e+13	7.79977e+13	7.73471e+13	2.55713e+13	8.60976e+13	2.63854e+13	5.14298e+13	7.00721e+13	6.73551e+13	7.52068e+13	21155778992254	7.21782e+13	2.03425e+13	9.05116e+13	7.70109e+13	2.36061e+13	3.41816e+13	8.54717e+13	3.57305e+13	1.89968e+13	4.59693e+13	65736511877702	78295542630775	7.04467e+13	7.55329e+13	4.58505e+13	5.3282e+13	8.47716e+13	7.15136e+13	7.69645e+13	6.85984e+13	8.10334e+13	8.02691e+13	6.44488e+13	1.04217e+13	4.38299e+13	8.40681e+13	2.69799e+13	1.9302e+13
	-2.75	5.06395e+13	2.36694e+13	5.56702e+13	55909113057484	5.38077e+13	3.27196e+13	18498237557033	3.40555e+13	9.92141e+12	1.76574e+13	5.65475e+13	5.25935e+13	1.63195e+13	6.03136e+13	18879751769767	3.52386e+13	5.05914e+13	48091008491551	5.18987e+13	1.65092e+13	4.88008e+13	1.33996e+13	6.13579e+13	5.37845e+13	1.82748e+13	2.21404e+13	6.01249e+13	2.13409e+13	1.45338e+13	2.99637e+13	4.63142e+13	5.37593e+13	4.80396e+13	5.46407e+13	3.53417e+13	3.80755e+13	5.75262e+13	5.24453e+13	5.73793e+13	4.82157e+13	5.9235e+13	54393606657479	4.57428e+13	7.26254e+12	3.25742e+13	5.77786e+13	1.84322e+13	1.36854e+13
	-3.25	3.54883e+13	2.4017e+13	3.91346e+13	3.91512e+13	3.71767e+13	2.37526e+13	1.4525e+13	22510153617135	9.18841e+12	13724370624911	3.8313e+13	3.7174e+13	14088726732364	4.01398e+13	1.54833e+13	2.43346e+13	3.48211e+13	3.1383e+13	3.70193e+13	12442386462980	3.4297e+13	7.2279e+12	4.03593e+13	3.81403e+13	1.13492e+13	1.45837e+13	42691608035305	1.59097e+13	9.92315e+12	2.19414e+13	3.17076e+13	3.80428e+13	3.15077e+13	37369140919574	2.39391e+13	2.69782e+13	4.24645e+13	3.66475e+13	3.76409e+13	3.2245e+13	3.76689e+13	3.83698e+13	3.24167e+13	3.84805e+12	2.22689e+13	3.98583e+13	1.30249e+13	1.08746e+13
	-3.75	2.19856e+13	1.76556e+13	27425035691908	2.60715e+13	2.44293e+13	1.29936e+13	8.13117e+12	1.39059e+13	7.92367e+12	7.95107e+12	2.77818e+13	2.43877e+13	8.8309e+12	2.63505e+13	14451528738781	1.78859e+13	2.47983e+13	2.10278e+13	2.47278e+13	7.93357e+12	2.39257e+13	5.82945e+12	2.72514e+13	2.3459e+13	8.65333e+12	1.02362e+13	28904589077311	1.2284e+13	5.87895e+12	1.53978e+13	2.23235e+13	2.56582e+13	1.72501e+13	2.34633e+13	1.6357e+13	1.92341e+13	2.90236e+13	2.33762e+13	2.62491e+13	2.15403e+13	2.4154e+13	2.60358e+13	2.34037e+13	3.35683e+12	1.93319e+13	2.8068e+13	8.52139e+12	5.86369e+12
	-4.25	1.55244e+13	1.17385e+13	1.98949e+13	1.84628e+13	1.98413e+13	7.25301e+12	4.66109e+12	1.04173e+13	4.36706e+12	7.55089e+12	1.6424e+13	1.63597e+13	7.56908e+12	1.73554e+13	5.97267e+12	1.12509e+13	1.61718e+13	1.53127e+13	1.64442e+13	4.37391e+12	1.82037e+13	5.73193e+12	1.6132e+13	1.68083e+13	5.55801e+12	6.49775e+12	1.89944e+13	6.49261e+12	4.32875e+12	7.55196e+12	1.55638e+13	1.74743e+13	9.85373e+12	1.53165e+13	1.18444e+13	1.19675e+13	19483796134462	1.51322e+13	1.92059e+13	1.38252e+13	1.80679e+13	1.71782e+13	1.54386e+13	3.29362e+12	1.44556e+13	3.4021e+13	7.4327e+12	3.85376e+12
	-4.75	8.45821e+12	1.03916e+13	1.1807e+13	1.2718e+13	1.05729e+13	4.52901e+12	2.54291e+12	7.24283e+12	4.35528e+12	5.11119e+12	9.67869e+12	9.93823e+12	6.69484e+12	1.11685e+13	3.4304e+12	8.17589e+12	9.20311e+12	8.94385e+12	1.08385e+13	3.84635e+12	1.09835e+13	2.26214e+12	9.58974e+12	1.08216e+13	4.17812e+12	4.6946e+12	1.26846e+13	4.9477e+12	4.49204e+12	4.33548e+12	9.71927e+12	1.07724e+13	8.36679e+12	1.00832e+13	7.26492e+12	8.86107e+12	1.1816e+13	8.53332e+12	1.22634e+13	1.00364e+13	1.3055e+13	1.13396e+13	9.80856e+12	3.92832e+12	8.21283e+12	4.11429e+13	5.11658e+12	4.86819e+12
	-5.25	6.08611e+12	5.9112e+12	5.53649e+12	8.97456e+12	6.98311e+12	3.00058e+12	3.47261e+12	3.41833e+12	3.55028e+12	2.70137e+12	5.94137e+12	6.14722e+12	1.66788e+12	6.41423e+12	2.62014e+12	6.39549e+12	7.95212e+12	7.34707e+12	6.34842e+12	3.76642e+12	7.41894e+12	2.0277e+12	7.04683e+12	7.41015e+12	2.95144e+12	4.79611e+12	7.34337e+12	3.73066e+12	2.20623e+12	2.65029e+12	6.5303e+12	6.04395e+12	5.00149e+12	4.97986e+12	4.86835e+12	6.05463e+12	6.11116e+12	7.94063e+12	7.93973e+12	8.16355e+12	6.94851e+12	5.99941e+12	6.62999e+12	1.65344e+12	7.72615e+12	2.8373e+13	4.35734e+12	2.43549e+12
	-5.75	4.51257e+12	4.53645e+12	5.54688e+12	4.60514e+12	4.79612e+12	2.62141e+12	2.68423e+12	2.93242e+12	3.52057e+12	3.96411e+12	5.36628e+12	3.91424e+12	2.80294e+12	6.82375e+12	2.68266e+12	2.92177e+12	4.78802e+12	3.18427e+12	5.12054e+12	1.6983e+12	3.00939e+12	2.69802e+12	4.80235e+12	4.25488e+12	3.26096e+12	2.9415e+12	2.49284e+12	4.46065e+12	1.59822e+12	2.2767e+12	3.47775e+12	3.18101e+12	2.18978e+12	4.80717e+12	4.79389e+12	5.21934e+12	6.83437e+12	4.05797e+12	5.49906e+12	6.06634e+12	4.35226e+12	6.09236e+12	4.31231e+12	1.59822e+12	4.78674e+12	1.86129e+13	3.30587e+12	2.49833e+12
	-6.25	3.62824e+12	2.63624e+12	2.81811e+12	3.18068e+12	2.50847e+12	3.20999e+12	4.5641e+12	1.59822e+12	2.03064e+12	1.59822e+12	3.54023e+12	1.97873e+12	1.59822e+12	3.22008e+12	3.07727e+12	2.36051e+12	3.69168e+12	5.2321e+12	3.6813e+12	2.73507e+12	6.27208e+12	3.29816e+12	3.19584e+12	2.54861e+12	1.59822e+12	2.31743e+12	2.35733e+12	2.67824e+12	2.49323e+12	3.5334e+12	1.94878e+12	3.32404e+12	1.72772e+12	3.22451e+12	3.57555e+12	4.19792e+12	2.84287e+12	4.38899e+12	4.72807e+12	4.37863e+12	2.81429e+12	3.08551e+12	2.05069e+12	1.59822e+12	3.83573e+12	1.24862e+13	1.59822e+12	3.17349e+12
	-6.75	3.3111e+12	1.59822e+12	3.23847e+12	3.20683e+12	2.52402e+12	2.68548e+12	2.50277e+12	2.34683e+12	1.59822e+12	1.59822e+12	3.41911e+12	1.88273e+12	2000440136857	2.6151e+12	2.03203e+12	3.23822e+12	1822084952156	1.85228e+12	2.52373e+12	2.27068e+12	1.70395e+12	1.59822e+12	1.59822e+12	2.14534e+12	1.7591e+12	1.59822e+12	1.70996e+12	2.89283e+12	1.59822e+12	2.30561e+12	1.98038e+12	4.65383e+12	1.59822e+12	3.85555e+12	3.4459e+12	2.72391e+12	1.59822e+12	2.80464e+12	3.61592e+12	1.67914e+12	2.60741e+12	3.61563e+12	3.22938e+12	1.59822e+12	3.91854e+12	9.16594e+12	1.59822e+12	1.59822e+12
[truncated: 23 more columns]

## Sheet: UVSopsinFluxvsAngle
		UVS Cone corrected photon flux (photons/cm2/s)
	OBSERVATION	1	2	3	4	5	6	7	8	9	10	11	12	13	14	15	16	17	18	19	20	21	22	23	24	25	26	27	28	29	30	31	32	33	34	35	36	37	38	39	40	41	42	43	44	45	46	47	48
	Solar Angle
	6.75	771852481791548	128011983136645	760492243598825	709163827070760	757129683415122	427209649105319	227903973480076	408363899445663	327333136903483	198371778070228	712438532239417	639542969290891	195719183620146	812114516350747	336272949456895	550662808795011	676623660165537	430299134916202	669064028408372	557258925660428	427274888241928	182901429024805	184551663040389	830047321517971	271943954805230	386669648801645	856115768727478	343740438796867	134389207016947	176782092081079	696523545680325	502872049689238	380575235293924	785325006274972	261800047867557	630562273692977	682887474258524	767342367095570	735764306556055	566182428987171	638468331223672	739534633694098	262212807889758	112672818862674	506678700632830	711695187705282	267664027259621	280769336553868
	6.25	685053612703906	114150223806610	697000577403911	666655743044853	696450353178939	352101629309196	205324783247672	407608849885876	329552203239468	173122809446612	656384223215391	594310512945200	168422356566782	744315391538480	368429977694984	483461269359176	625124990615493	433360233070858	614237840115539	520090561834527	380346246535423	176164150730316	276519325229204	776215438462065	243957160678120	364734239778622	794390306890104	323754561378275	132508299392340	178487640396671	643196663019398	480117988334529	403390008778101	744968002965213	254095766222792	568199085522026	641436842772067	701028553802406	670550192744004	504813576134205	591296343631013	677674900003768	264358696073814	106790826176577	471730000192521	657501383368057	316765760367941	226162726830641
	5.75	600202291557311	9.93912e+13	641151331187570	615949673162900	637376517814772	313851569492039	190299459290730	373878000978549	314601454887143	156335696729133	604165561507374	549667703313177	154396556518284	679951163414084	330896870386203	416335978948378	571617808158706	428005365493483	563393202397043	477527409623320	349600854653480	186964946144774	315007588543939	709720745446588	226531917709072	338137308192617	730653156990875	286105775527555	108845447516511	184847774020550	580404920602606	493337262569835	420377143577938	613930828835388	269611390003311	508842819274052	581445428276624	641367472414721	605033905841712	473312146085382	539962546732693	615622335080758	277134095924723	9.86725e+13	433044529301505	603886254399680	201509090035406	197102774099371
	5.25	524331916845204	123987284683310	579403160019441	560905278391991	578153961923513	281584804914978	180193050200657	338134732910822	294601119436919	147120451312899	551343903636484	513047039269790	143469848558899	613435982927384	245785880026789	362220386422616	520763494843921	406410838983596	516218617100500	423403714056347	313656350801725	184523879093290	344803800468214	622438371022275	220933036822190	297211369541790	669070152905257	247385563618640	106986834060748	150574219749438	526819844500029	485574975713382	356152031018391	419466805658003	262581692358432	451854821985044	517203742402228	574361005162294	548196772607651	450059924472810	481094067127651	558264463633880	261557635575759	8.95928e+13	395770203214692	551793122440771	221053712239632	195729063084243
	4.75	468221911460448	9.0287e+13	521764515860008	508915686443332	520843803623411	224488302872464	175758122353980	307392320697531	327720549018957	111715241166498	498906768190435	470732906315996	129087090827019	550388030346578	217823967515162	319766255985911	470327663414046	376800295001414	470046511956116	370054885221904	266065329775774	148812026110256	369200923697928	552707981774589	212438595746192	256280009939212	594189117848526	246338470212455	9.82122e+13	128802339755499	482337752446551	433245791197506	321512580159753	291500725521329	224054104964466	408952920108660	483875505219064	511434867743726	494444501086755	422878993097937	430642877135062	503694359556500	198794702647874	8.59473e+13	350710297900106	496783364981172	298698520901186	179259777546902
	4.25	425998231143536	5.0181e+13	467168814682553	456227185058482	464868292061059	181020345262818	163328839239660	273381948130889	341755126404172	8.38372e+13	445638854713870	429195125352784	113287189006076	471998691181560	160362882052414	285290851280313	422919314632800	343597596364208	423721925420165	327414507401113	221320283784013	113518103155182	351824089266654	483526597253853	192719883095696	225096995949782	532668387795802	231223231461726	9.63858e+13	130037739336775	430910182607847	424132291192965	320806562986454	191978730295775	230992834256114	360503284159946	434596939328438	452204085947857	442090596053620	379267801554716	394826041755728	460711387550784	150918153043994	8.02047e+13	306294453756323	450327163738843	348825720245977	177336445233869
	3.75	392252145281994	3.56934e+13	415775070744684	406660215426082	413348299967821	183119496353499	133190318281395	236236220124491	327433316720796	5.91567e+13	397961417939496	383224952526104	105449756524118	392509927098147	149130986583079	258365111858161	376771977526829	310560546327486	375454664276830	282676882074729	192633294343204	9.52735e+13	246685312788893	429801219233246	164786455316833	205202548342039	473389379910530	195010633661332	8.44005e+13	169338801450922	378485434789823	422542939017466	265693472234473	161521772090441	230521363170714	297716885632680	395977992528861	399574700439267	390905712871130	323794408427926	357311349344318	408879248364198	168191808759537	6.47557e+13	265753445684430	399673116665798	273374935861106	153673064228743
	3.25	352707249116742	4.65892e+13	363799822055063	358005408366394	361876450291619	202530854891688	107555517955629	208961080369070	266024575463684	5.65798e+13	349349696486171	338188260488187	101111019686029	324095246270674	178754105993153	238053901309718	332322952408267	277514113969282	332328620711150	234385236053315	167995278609439	9.11466e+13	181414751421666	390751921536827	136226829530745	173345727458468	417710403096652	165051625759869	7.64926e+13	226205393536386	326052685964924	386058867117843	266608599456105	140165628435007	217808144383363	248554124652286	362175723776212	348151776359501	343871508109511	273851516209143	314329099552694	352875206060786	135452728105051	4.9107e+13	228848999301354	350375261753914	202925081354783	141707617554762
	2.75	304395391195234	45256087733911	310148826463751	312220230003260	313430887077384	200957180849015	9.37707e+13	200960879885878	216372429696677	5.73429e+13	304129295177281	298177099051343	8.22875e+13	280663225689800	176639187313241	208262136157658	289075281835616	241205148952278	286122519811368	181170838093460	156242696825255	6.81336e+13	216591496844202	341243767653181	109503689947642	149044516704653	361983148433490	135324116362797	67990965037070	210019624270207	281460604914905	334132562054728	234708665550689	150889371703228	195080630764607	207231037248492	318537021433177	293379575342645	299122281931016	230642858114517	269479788150313	304078390625492	137456261396754	4.17841e+13	193988334709870	304652964890347	144424953384983	118550988754577
	2.25	249793819565724	3.51158e+13	265168217509307	259726530340661	266786281012501	190549641018403	8.03498e+13	190194468794323	167014032897474	74831776095676	258967775726554	250644090144723	7.34555e+13	238799988421395	106629961465465	170071332858438	246604311665920	209591689468954	244925745898184	138789688171249	141026586975727	4.74197e+13	233829548427119	295243752375483	9.17755e+13	131181106443000	302134569907642	107228943765554	5.71008e+13	175804781654218	241561513776430	284506580404773	202524610327955	130391337818737	171316345338730	170484104952899	265457147221301	250906804112702	257611145152591	201770655688912	228915547838880	258725927600275	131266182090267	3.77704e+13	157939522428860	253676400877273	111394937474980	9.87319e+13
	1.75	210254155991201	5.19094e+13	224057823266869	216035083830070	219544548478049	177899344897594	68608660503791	170887901802659	127970896410097	7.05981e+13	218347848946744	210851209073075	6.42382e+13	209988247184584	7.72266e+13	149829773579163	201342419261308	179224193187195	206980520917905	110831654237741	120817085307003	4.45904e+13	168738705537051	245993343584862	7.78597e+13	112410090061558	252642627615509	8.51214e+13	4.73575e+13	147439215070344	199128385762578	237679890892458	176771843589799	143997749529702	128295769295029	144103121081116	221802850836601	211572563524712	213553582742100	176671917273865	184067511873683	217770278941007	137111355471966	32572145352541	127900973014694	214343144568069	9.78619e+13	6.85198e+13
	1.25	176650769575508	6.26606e+13	181016857005983	178138858373541	180145669999055	147097695311667	5.72173e+13	144907287907642	8.10764e+13	56172780915090	175943969585205	174639746118907	5.39315e+13	173031257974716	103687836332047	140599493085214	165834472132519	145453834187846	166339091047466	8.77046e+13	104932454819152	4.42259e+13	80813228550495	198253550673665	6.27121e+13	93300119148266	208027736552771	7.26992e+13	3.83066e+13	132270874061311	160472739067219	189792874846324	127113633827492	129382576961049	105457569458228	113442210502334	186011751360114	171520234482826	174957076353385	146078689056661	146015430550162	180557924686343	113857582103645	2.81389e+13	103204738670468	176539770583129	8.41843e+13	5.42279e+13
	0.75	139568042659741	5.04916e+13	142218024943138	140840984264352	146503533946006	111205639385427	4.71159e+13	114997486790254	5.62328e+13	4.23663e+13	136791598642516	135821677809920	4.06948e+13	139121171319454	109622563591436	117334324844835	134079411984944	115994813986062	128587032691192	66721426558701	9.33887e+13	3.25015e+13	5.35347e+13	159123922893248	5.02818e+13	6.99519e+13	161794507809212	5.18941e+13	3.11877e+13	106432440125239	126978631646142	143839998534798	103087958981713	108476630548113	8.79551e+13	9.15976e+13	146500746327091	135149331460981	142813313617144	113284831927062	112863914965281	141629548303449	8.3518e+13	2.35785e+13	8.06898e+13	138172861633332	9.58663e+13	4.40808e+13
	0.25	106023256898280	2.93281e+13	107577544422940	107313738186850	110404350794099	8.15728e+13	3.48311e+13	8.45303e+13	4.6875e+13	2.99195e+13	102941752634285	102605115724245	3.30984e+13	108720505707659	8.68496e+13	9.04226e+13	101794153523871	9.16949e+13	9.67266e+13	4.96529e+13	7.92295e+13	2.49222e+13	3.67192e+13	126265309945527	3.58626e+13	5.22578e+13	121111654339112	4.27881e+13	2.458e+13	7.41333e+13	9.66876e+13	104200827039859	9.03367e+13	9.76165e+13	6.74436e+13	7.24674e+13	113364591993094	101825287515108	109886980048912	8.21256e+13	8.78419e+13	106752101820974	6.14569e+13	1.67282e+13	6.19331e+13	104235272054840	7.62693e+13	3.28106e+13
	-0.25	7.49957e+13	3.06599e+13	7.91522e+13	7.95364e+13	7.94464e+13	6.00656e+13	2.42759e+13	5.96015e+13	2.15851e+13	2.18588e+13	7.48011e+13	7.36163e+13	2.778e+13	7.85184e+13	4.23191e+13	6.51072e+13	74259663332423	6.55784e+13	6.94531e+13	3.17697e+13	6.20863e+13	2.15756e+13	4.83839e+13	8.98341e+13	2.83781e+13	3.89356e+13	87967874896804	2.86987e+13	1.81735e+13	4.08627e+13	7.11188e+13	7.92648e+13	6.76473e+13	7.79063e+13	51411708078204	5.3284e+13	8.35333e+13	7.5872e+13	7.70891e+13	62555267319644	6.3964e+13	7.86636e+13	4.49786e+13	12780027076388	4.55247e+13	74975695682985	3.80614e+13	2.33597e+13
	-0.75	49869793772068	3.22342e+13	5.62037e+13	57222603044539	5.20151e+13	4.15039e+13	1.77395e+13	3.90968e+13	1.22829e+13	1.43564e+13	5.1485e+13	5.18849e+13	1.96105e+13	5.317e+13	2.1174e+13	41548156169445	5.14094e+13	4.53745e+13	5.02722e+13	2.11258e+13	4.47167e+13	15654707701845	4.73537e+13	6.25931e+13	1.89858e+13	2.51779e+13	6.15831e+13	1.86959e+13	12253127661132	2.22296e+13	4.86105e+13	5.94628e+13	4.67716e+13	5.81274e+13	3.55939e+13	36661163382582	5.80974e+13	5.23309e+13	5.39038e+13	4.6814e+13	44371908086095	5.53529e+13	2.90281e+13	8.39266e+12	3.19807e+13	5.27674e+13	2.13986e+13	1.74958e+13
	-1.25	3.56925e+13	25005806124188	3.88899e+13	3.9287e+13	3.749e+13	2.85436e+13	1.3357e+13	2.42641e+13	6.12667e+12	9.80438e+12	3.67538e+13	3.45894e+13	1.40655e+13	3.53531e+13	1.47789e+13	2.61271e+13	3.63944e+13	3.12166e+13	3.58835e+13	1.21811e+13	31424786706902	10646734574547	3.80368e+13	4.0547e+13	1.43173e+13	1.74343e+13	4.27026e+13	14880126026207	8.77823e+12	1.5972e+13	3.44305e+13	4.11884e+13	3.30683e+13	4.04359e+13	2.08438e+13	2.63549e+13	3.98057e+13	3.77414e+13	3.86297e+13	34106619777432	3.15087e+13	3.70204e+13	22395549218393	6.20829e+12	2.32038e+13	36298133306432	1.61127e+13	1.11349e+13
	-1.75	2.56047e+13	1.39345e+13	2.95614e+13	2.62593e+13	27681439820999	1.97371e+13	9.80356e+12	1.65637e+13	4.95124e+12	7.12959e+12	2.62947e+13	2.6234e+13	9.41872e+12	2.48013e+13	9.58613e+12	1.6309e+13	2.48383e+13	2.27303e+13	2.44023e+13	8.26717e+12	2.16221e+13	8.90713e+12	2.94796e+13	2.93567e+13	1.00007e+13	1.05832e+13	3.06604e+13	1.29936e+13	5.47327e+12	13906870150217	2.57761e+13	2.98049e+13	23553046184526	2.82996e+13	1.49666e+13	1.95744e+13	2.67414e+13	2.79651e+13	2.71571e+13	2.57551e+13	2.24382e+13	2.77848e+13	2.04978e+13	4.37601e+12	1.67523e+13	2.58168e+13	1.05445e+13	7.91548e+12
	-2.25	1.76171e+13	9.65717e+12	1.99962e+13	1.95956e+13	1.86783e+13	1.32686e+13	6597805078894	1.34655e+13	2.72965e+12	5.42209e+12	19074029519272	1.91032e+13	6.43547e+12	1.83233e+13	7.01672e+12	1.27543e+13	1.83085e+13	1.67622e+13	1.71502e+13	7.20766e+12	1.61823e+13	6.61932e+12	2.12697e+13	2.04826e+13	6.38455e+12	9241179763992	1.96734e+13	8.75157e+12	5.52456e+12	1.28829e+13	19074023142412	2.00244e+13	1.71124e+13	2.1089e+13	12699822490933	1.40118e+13	2.18982e+13	1.94979e+13	1.95398e+13	1.81057e+13	16637319433213	1.93114e+13	1.63229e+13	3.601e+12	1.21749e+13	19669133543123	7.20246e+12	6.26356e+12
	-2.75	1.41446e+13	6.87436e+12	15270239333500	1.54749e+13	1.44079e+13	1.04929e+13	4.45059e+12	1.0319e+13	3.0432e+12	5.80719e+12	1.56566e+13	1.36265e+13	3.69627e+12	1.4602e+13	5.0715e+12	8.29479e+12	1.44168e+13	1.35038e+13	1.18848e+13	5.82539e+12	10929389102349	4.23353e+12	15810189954465	1.50361e+13	5.86293e+12	5.77344e+12	14644746676478	5.88183e+12	4.35604e+12	8.49876e+12	1.34098e+13	14962877398729	12814498042855	1.53432e+13	9.59237e+12	1.09799e+13	14264777465868	1.49146e+13	1.54742e+13	1.33913e+13	1.25565e+13	1.4627e+13	11941853701773	2.9153e+12	1.01442e+13	1.33818e+13	5.80713e+12	4.52661e+12
	-3.25	9.51978e+12	7.23225e+12	1.06012e+13	1.08368e+13	10922374919209	8.45827e+12	4.92688e+12	7.09803e+12	3.30266e+12	5.33683e+12	1.04257e+13	1.02963e+13	4.43264e+12	9.99589e+12	5.3739e+12	6.52725e+12	9.84078e+12	8.17231e+12	9.25231e+12	5.0519e+12	8.51088e+12	2.1557e+12	1.11719e+13	1.10193e+13	3.08784e+12	3.47498e+12	11535726739493	4.90615e+12	3.40333e+12	6.48766e+12	1.05074e+13	1.17227e+13	8.68254e+12	1.10352e+13	6.48559e+12	7.82296e+12	1.15966e+13	1.08496e+13	1.01009e+13	9.53562e+12	8.90147e+12	1.02096e+13	9.34009e+12	1.35339e+12	6.11757e+12	9.70779e+12	4.96787e+12	3.25593e+12
	-3.75	6.63189e+12	6.37424e+12	7.86538e+12	7.4575e+12	6.79161e+12	4.83514e+12	2.60418e+12	4.00395e+12	3.24415e+12	3.03469e+12	8.84291e+12	6.47726e+12	3.24662e+12	7.09838e+12	4.38975e+12	4.82653e+12	8.07202e+12	6.4568e+12	6.94054e+12	2.84771e+12	5.8847e+12	2.10964e+12	8.00081e+12	6.71712e+12	3.5483e+12	2.749e+12	8.22195e+12	4.62131e+12	1.73805e+12	5.73235e+12	7.6073e+12	7.96251e+12	4.30004e+12	7.37331e+12	4.98004e+12	5.55024e+12	8.71663e+12	7.36811e+12	7.54981e+12	6.55041e+12	5.73616e+12	7.59102e+12	7.80543e+12	1.11465e+12	6.90343e+12	7.75905e+12	2.35778e+12	2.19176e+12
	-4.25	5.26221e+12	4.13749e+12	6.85617e+12	6.61944e+12	7.22074e+12	3.26938e+12	1.80223e+12	4.70419e+12	1.83696e+12	3.46805e+12	5.39839e+12	5.75625e+12	2.68515e+12	5.41255e+12	2.01714e+12	3.22532e+12	5.03202e+12	4.50557e+12	5.81272e+12	1.79401e+12	5288788786571	2.61867e+12	4.68858e+12	5.89744e+12	1.90616e+12	2.591e+12	6.36288e+12	1.75996e+12	1.87756e+12	2.92759e+12	6.17199e+12	7.30097e+12	3.19208e+12	4.66087e+12	4.19122e+12	3.98231e+12	6.19217e+12	4.83098e+12	6.55348e+12	5.06586e+12	5.09585e+12	5.26542e+12	4.50977e+12	1.20588e+12	5.68741e+12	9.34961e+12	2.91404e+12	1.76328e+12
	-4.75	2.74535e+12	4.54389e+12	3.68472e+12	4.34734e+12	3.39807e+12	1.96781e+12	1.11465e+12	3.24369e+12	2.24233e+12	2.47224e+12	3.69761e+12	3.19739e+12	2.84149e+12	3.41024e+12	1.11465e+12	2.79338e+12	2.5667e+12	2.63321e+12	3.36951e+12	1.82936e+12	4.06476e+12	1.1825e+12	3.21703e+12	4.15715e+12	1.29476e+12	1.64866e+12	4.2724e+12	1.69247e+12	2.28753e+12	2.05495e+12	4.3538e+12	4.47188e+12	3.11063e+12	4.99159e+12	3.44312e+12	2.83283e+12	4.43319e+12	2.88797e+12	4.12947e+12	3.2905e+12	4.83469e+12	4.09488e+12	3.33695e+12	2.05725e+12	2.8674e+12	1.11725e+13	2.21693e+12	2.96347e+12
	-5.25	2.10845e+12	2.86071e+12	1.11465e+12	3.48081e+12	2.08389e+12	1.60186e+12	1.61018e+12	1.71849e+12	1.92138e+12	1.78375e+12	2.28627e+12	1.98739e+12	1.11465e+12	2.09305e+12	1.11465e+12	2.44869e+12	3.14524e+12	3.69342e+12	2.16347e+12	2.03643e+12	2.26099e+12	1.73138e+12	2.62659e+12	3.72909e+12	1.40706e+12	2.6323e+12	2.39158e+12	1.81477e+12	1.34825e+12	1.73291e+12	2.73645e+12	2.70729e+12	2.34686e+12	1.93766e+12	2.30539e+12	2.8045e+12	2.37257e+12	3.03412e+12	2.82093e+12	3.88399e+12	2.20051e+12	2.04356e+12	2.47549e+12	1.11465e+12	3.48829e+12	7.71467e+12	1.97787e+12	1.51413e+12
	-5.75	2.05851e+12	1.92668e+12	2.43663e+12	1.89043e+12	1.97668e+12	1.13185e+12	1.48634e+12	1.2653e+12	2.54332e+12	2.41863e+12	2.88596e+12	1.71604e+12	1.62582e+12	2.39032e+12	1.58125e+12	1.40998e+12	2.3019e+12	1.11465e+12	2.26966e+12	1.24456e+12	1.11465e+12	1.33769e+12	2.43237e+12	2.63646e+12	1.11465e+12	1.57478e+12	1.11465e+12	2.40724e+12	1.16414e+12	1.78565e+12	1.39298e+12	1.39939e+12	1.15654e+12	3.22022e+12	1.99317e+12	2.20319e+12	2.70414e+12	1.11465e+12	2.49106e+12	3.04042e+12	1.99652e+12	2.89215e+12	2.09554e+12	1.11465e+12	2.62212e+12	5.96435e+12	2.01435e+12	1.26569e+12
	-6.25	2.30838e+12	1.46746e+12	1.12987e+12	1.74053e+12	1.11465e+12	1.11465e+12	2.55074e+12	1.11465e+12	1.11465e+12	1.11465e+12	1.79287e+12	1.11465e+12	1.11465e+12	1.2681e+12	1.46365e+12	2.09449e+12	2.0124e+12	2.02408e+12	1.85979e+12	1.18109e+12	3.00856e+12	2.10748e+12	1.5202e+12	1.34695e+12	1.11465e+12	1.1672e+12	1.79067e+12	1.72392e+12	1.97775e+12	2.28738e+12	1.11465e+12	1.69308e+12	1.11465e+12	2.45387e+12	1.53863e+12	2.15004e+12	1.49558e+12	1.82028e+12	1.94842e+12	1.7522e+12	1.11465e+12	1.11465e+12	1.11465e+12	1.11465e+12	1.51603e+12	4.32486e+12	1.11465e+12	1.73712e+12
	-6.75	1.64309e+12	1.16532e+12	1.76976e+12	1685810320540	1.27794e+12	1.65548e+12	1.87889e+12	1.35006e+12	1.11465e+12	1.11465e+12	1.85847e+12	1.11465e+12	1.46721e+12	1.43336e+12	1.11465e+12	2.19048e+12	1.14777e+12	1.11465e+12	1.56471e+12	1.80743e+12	1.11465e+12	1.70504e+12	1.11465e+12	1.14588e+12	2.29098e+12	1.11465e+12	1.13946e+12	1.85973e+12	1.11465e+12	1.71263e+12	1.63566e+12	2.48604e+12	1.11465e+12	2.57463e+12	2.28479e+12	1.96986e+12	1.11465e+12	2.02107e+12	2.0219e+12	1.11465e+12	1.47577e+12	1.94951e+12	1.11465e+12	1.11465e+12	2.23518e+12	3.9082e+12	1.11465e+12	1.11465e+12
[truncated: 23 more columns]
